# Supplementary material for: Improved Synthesis of Asymmetric Curcuminoids and Their Assessment as Antioxidants
Source: MDPI journal article supplement (doi:10.3390/molecules27082547), 2022-04-14
Supplement: s1 [file s1]

## Supporting materials

### Improved Synthesis of Asymmetric Curcuminoids and their Assessment as Antioxidants

Yang-Je Cheng <sup>1</sup>, Cai-Wei Li <sup>2</sup>, Cing-Ling Kuo <sup>1</sup>, Tzenge-Lien Shih <sup>1,\*</sup>, and Jih-Jung Chen <sup>3,4,\*</sup>

<sup>1</sup> Department of Chemistry, Tamkang University, Tamsui Dist., New Taipei City 251301, Taiwan, Republic of China; jason0110422@gmail.com (Y.-J.C.); rose40635@gmail.com (C.-L.K.)

<sup>2</sup> Institute of Traditional Medicine, National Yang Ming Chiao Tung University, Taipei 112304, Taiwan; leecw1219.y@nycu.edu.tw (C.-W.L.)

<sup>3</sup> Department of Pharmacy, College of Pharmaceutical Sciences, National Yang Ming Chiao Tung University, Taipei 112304, Taiwan

<sup>4</sup> Department of Medical Research, China Medical University Hospital, China Medical University, Taichung 404332, Taiwan

\* Correspondence: tlshih@mail.tku.edu.tw (T.-L.S.)\*; jjungchen@nycu.edu.tw (J.-J.C.)\*; Tel.: +886-2-2826-7195 (J.-J.C.)\*; Fax: +886-2-2823-2940 (J.-J.C.)\*.

## Contents

|                                                                                                 |     |
|-------------------------------------------------------------------------------------------------|-----|
| Figure S1. $^1\text{H}$ NMR (600 MHz, $\text{CDCl}_3$ ) for compound <b>6</b> .....             | S4  |
| Figure S2. $^{13}\text{C}$ NMR (150 MHz, $\text{CDCl}_3$ ) for compound <b>6</b> .....          | S4  |
| Figure S3. $^1\text{H}$ NMR (600 MHz, $\text{CDCl}_3$ ) for compound <b>9a</b> .....            | S5  |
| Figure S4. $^{13}\text{C}$ NMR (150 MHz, $\text{CDCl}_3$ ) for compound <b>9a</b> .....         | S5  |
| Figure S5. $^1\text{H}$ NMR (600 MHz, $\text{CDCl}_3$ ) for compound <b>9b</b> .....            | S6  |
| Figure S6. $^{13}\text{C}$ NMR (150 MHz, $\text{CDCl}_3$ ) for compound <b>9b</b> .....         | S6  |
| Figure S7. $^1\text{H}$ NMR (600 MHz, $\text{CDCl}_3$ ) for compound <b>9c</b> .....            | S7  |
| Figure S8. $^{13}\text{C}$ NMR (150 MHz, $\text{CDCl}_3$ ) for compound <b>9c</b> .....         | S7  |
| Figure S9. $^1\text{H}$ NMR (600 MHz, $\text{CDCl}_3$ ) for compound <b>9d</b> .....            | S8  |
| Figure S10. $^{13}\text{C}$ NMR (150 MHz, $\text{CDCl}_3$ ) for compound <b>9d</b> .....        | S8  |
| Figure S11. $^1\text{H}$ NMR (600 MHz, $\text{CD}_3\text{OD}$ ) for compound <b>9e</b> .....    | S9  |
| Figure S12. $^{13}\text{C}$ NMR (150 MHz, $\text{CD}_3\text{OD}$ ) for compound <b>9e</b> ..... | S9  |
| Figure S13. $^1\text{H}$ NMR (600 MHz, $\text{CD}_3\text{OD}$ ) for compound <b>9f</b> .....    | S10 |
| Figure S14. $^{13}\text{C}$ NMR (150 MHz, $\text{CD}_3\text{OD}$ ) for compound <b>9f</b> ..... | S10 |
| Figure S15. $^1\text{H}$ NMR (600 MHz, $\text{CDCl}_3$ ) for compound <b>9g</b> .....           | S11 |
| Figure S16. $^{13}\text{C}$ NMR (150 MHz, $\text{CDCl}_3$ ) for compound <b>9g</b> .....        | S11 |
| Figure S17. $^1\text{H}$ NMR (600 MHz, $\text{CDCl}_3$ ) for compound <b>9h</b> .....           | S12 |
| Figure S18. $^{13}\text{C}$ NMR (150 MHz, $\text{CDCl}_3$ ) for compound <b>9h</b> .....        | S12 |
| Figure S19. $^1\text{H}$ NMR (600 MHz, $\text{CDCl}_3$ ) for compound <b>9i</b> .....           | S13 |
| Figure S20. $^{13}\text{C}$ NMR (150 MHz, $\text{CDCl}_3$ ) for compound <b>9i</b> .....        | S13 |
| Figure S21. $^1\text{H}$ NMR (600 MHz, $\text{CD}_3\text{OD}$ ) for compound <b>9j</b> .....    | S14 |
| Figure S22. $^{13}\text{C}$ NMR (150 MHz, $\text{CD}_3\text{OD}$ ) for compound <b>9j</b> ..... | S14 |

|                                                                                           |     |
|-------------------------------------------------------------------------------------------|-----|
| Figure S23. $^1\text{H}$ NMR (600 MHz, $\text{CDCl}_3$ ) for compound <b>9k</b> .....     | S15 |
| Figure S24. $^{13}\text{C}$ NMR (150 MHz, $\text{CDCl}_3$ ) for compound <b>9k</b> .....  | S15 |
| Figure S25. $^1\text{H}$ NMR (600 MHz, $\text{CDCl}_3$ ) for compound <b>9l</b> .....     | S16 |
| Figure S26. $^{13}\text{C}$ NMR (150 MHz, $\text{CDCl}_3$ ) for compound <b>9l</b> .....  | S16 |
| Figure S27. $^1\text{H}$ NMR (600 MHz, $\text{CDCl}_3$ ) for compound <b>10e</b> .....    | S17 |
| Figure S28. $^{13}\text{C}$ NMR (150 MHz, $\text{CDCl}_3$ ) for compound <b>10e</b> ..... | S17 |
| Figure S29. HR-ESI-MS for compound <b>9a</b> .....                                        | S18 |

<sup>1</sup>H of CLK1-82up

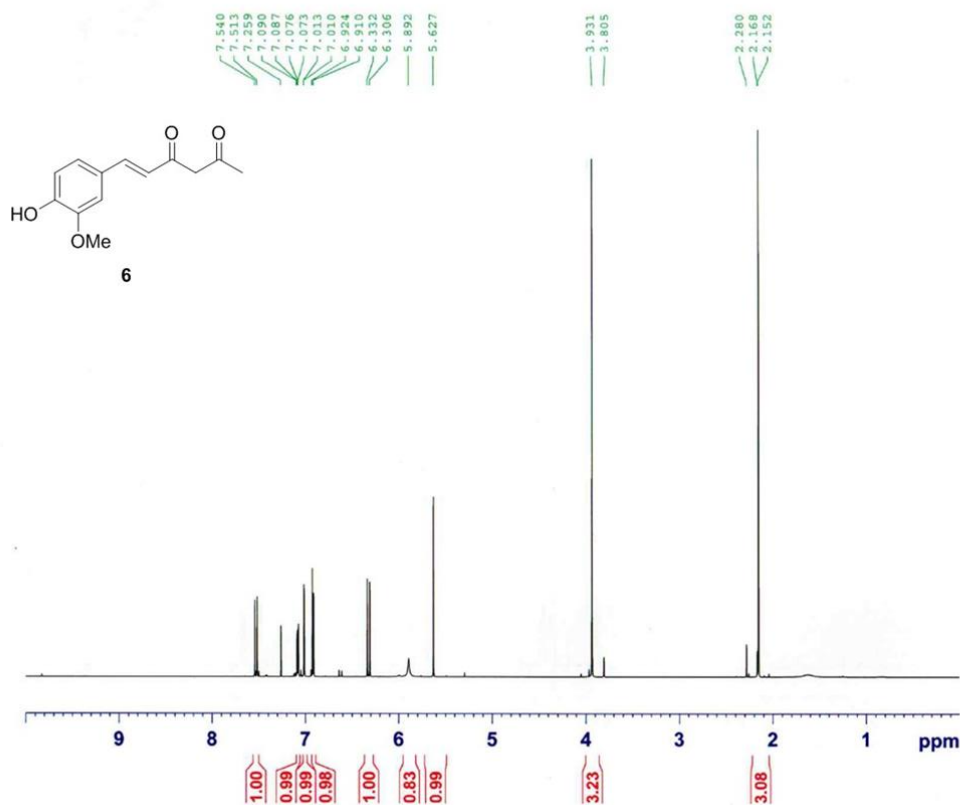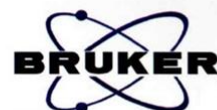

NAME CLK1-82up  
EXPNO 1  
PROCNO 1  
Date\_ 20200904  
Time 11.12  
INSTRUM spect  
PROBHD 5 mm TXI 1H/D-  
PULPROG zg30  
TD 32768  
SOLVENT CDCl3  
NS 16  
DS 0  
SWH 7788.162 Hz  
FIDRES 0.237676 Hz  
AQ 2.1038198 sec  
RG 406  
DW 64.200 usec  
DE 6.00 usec  
TE 300.0 K  
D1 2.00000000 sec  
TD0 1

===== CHANNEL f1 =====  
NUC1 1H  
P1 8.00 usec  
PL1 -0.19 dB  
PL1W 20.99374771 W  
SFO1 600.1336008 MHz  
SI 16384  
SF 600.1300113 MHz  
WDW no  
SSB 0  
LB 0.00 Hz  
GB 0  
PC 1.00

Figure S1. <sup>1</sup>H NMR (600 MHz, CDCl<sub>3</sub>) for compound 6.

<sup>13</sup>C of CLK1-82up

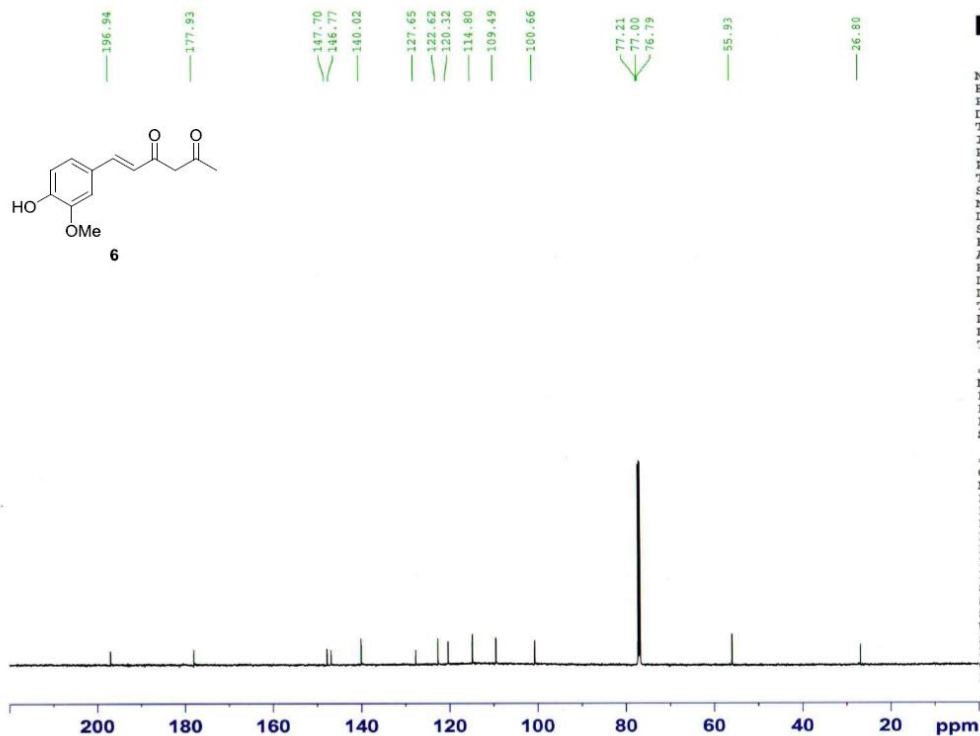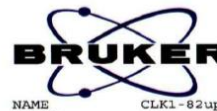

NAME CLK1-82up  
EXPNO 2  
PROCNO 1  
Date\_ 20200904  
Time 11.31  
INSTRUM spect  
PROBHD 5 mm TXI 1H/D-  
PULPROG zgpg30  
TD 65536  
SOLVENT CDCl3  
NS 308  
DS 0  
SWH 33333.332 Hz  
FIDRES 0.508626 Hz  
AQ 0.9831050 sec  
RG 46300  
DW 15.000 usec  
DE 6.00 usec  
TE 300.0 K  
D1 2.40000000 sec  
D11 0.03000000 sec  
TD0 1

===== CHANNEL f1 =====  
NUC1 13C  
P1 12.00 usec  
PL1 -3.55 dB  
PL1W 213.31983948 W  
SFO1 150.9194083 MHz  
===== CHANNEL f2 =====  
CPDPRG2 waltz16  
NUC2 1H  
PCPD2 90.00 usec  
PL2 -1.80 dB  
PL12 18.50 dB  
PL13 21.50 dB  
PL2W 30.41515160 W  
PL12W 0.28385070 W  
PL13W 0.14226235 W  
SFO2 600.1339008 MHz  
SI 32768  
SF 150.9028120 MHz  
WDW EM  
SSB 0  
LB 3.00 Hz  
GB 0  
PC 1.00

Figure S2. <sup>13</sup>C NMR (150 MHz, CDCl<sub>3</sub>) for compound 6.

<sup>1</sup>H of CLK1-68

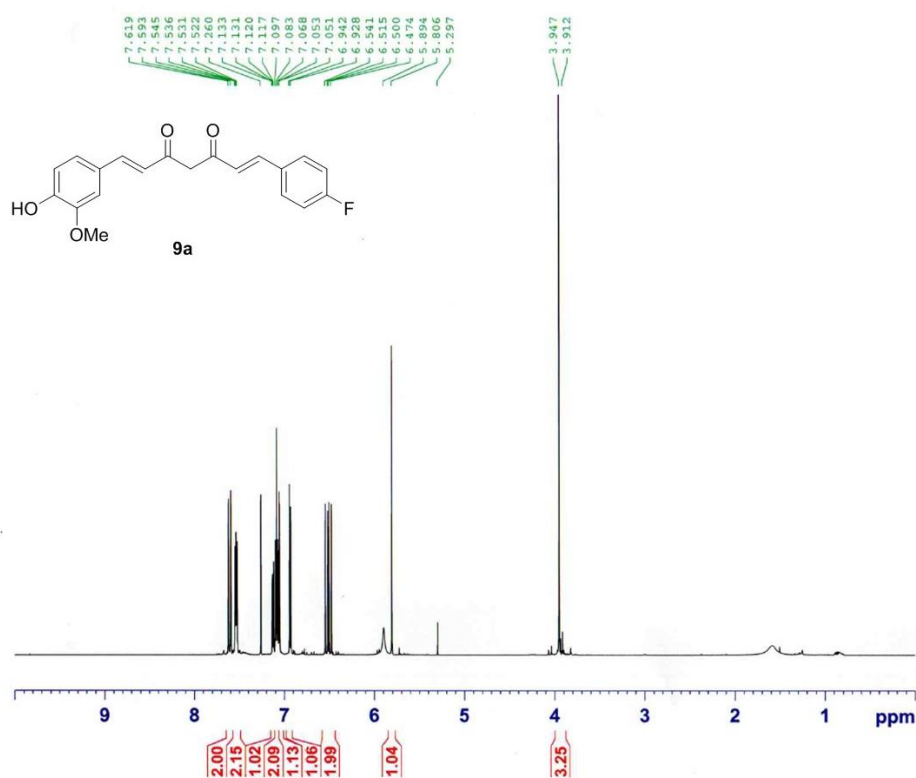

Figure S3. <sup>1</sup>H NMR (600 MHz, CDCl<sub>3</sub>) for compound 9a.

<sup>13</sup>C of CLK1-68

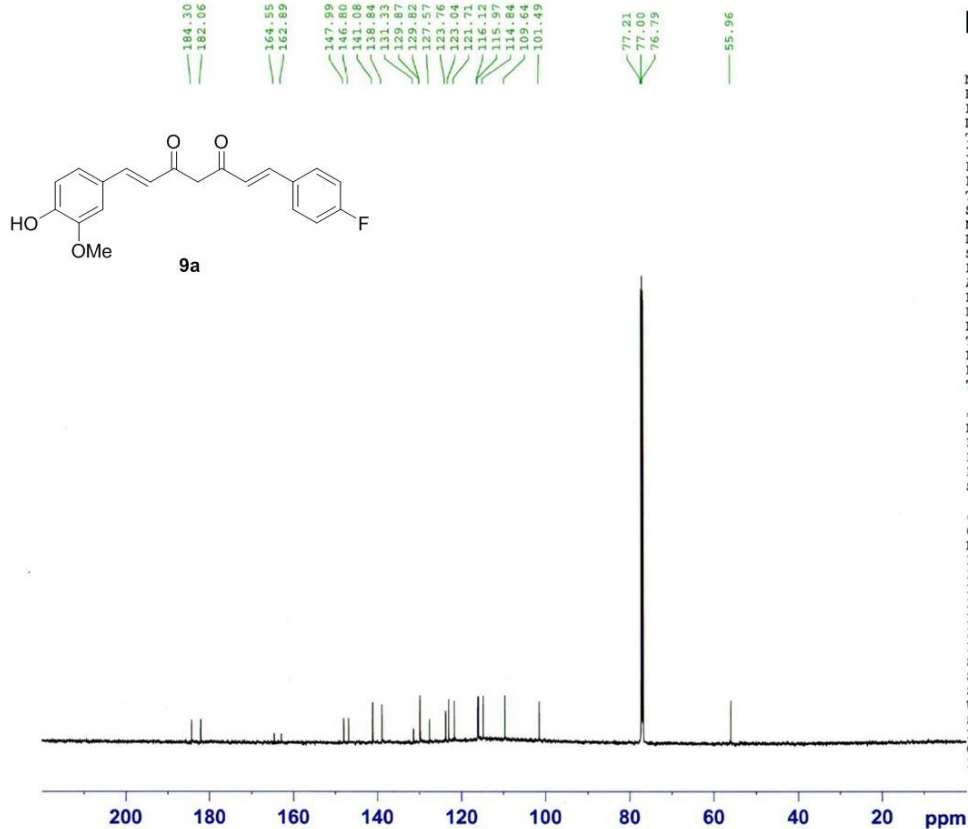

Figure S4. <sup>13</sup>C NMR (150 MHz, CDCl<sub>3</sub>) for compound 9a.

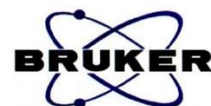

NAME CLK1-68  
EXPNO 1  
PROCNO 1  
Date\_ 20200826  
Time 8.52  
INSTRUM spect  
PROBHD 5 mm TXI 1H/D-  
PULPROG zg30  
TD 32768  
SOLVENT CDCl3  
NS 16  
DS 0  
SWH 8389.262 Hz  
FIDRES 0.256020 Hz  
AQ 1.9530824 sec  
RG 1150  
DW 59.600 usec  
DE 6.00 usec  
TE 299.8 K  
D1 2.00000000 sec  
TD0 1

===== CHANNEL f1 =====  
NUC1 1H  
P1 8.00 usec  
PL1 -0.19 dB  
PL1W 20.99374771 W  
SFO1 600.1342009 MHz  
SI 16384  
SF 600.1300110 MHz  
WDW no  
SSB 0  
LB 0.00 Hz  
GB 0  
PC 1.00

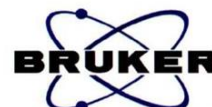

NAME CLK1-68  
EXPNO 2  
PROCNO 1  
Date\_ 20200826  
Time 9.57  
INSTRUM spect  
PROBHD 5 mm TXI 1H/D-  
PULPROG zgpg30  
TD 65536  
SOLVENT CDCl3  
NS 1012  
DS 0  
SWH 33333.332 Hz  
FIDRES 0.508626 Hz  
AQ 0.9831050 sec  
RG 46300  
DW 15.000 usec  
DE 6.00 usec  
TE 300.3 K  
D1 2.40000010 sec  
D11 0.03000000 sec  
TD0 1

===== CHANNEL f1 =====  
NUC1 13C  
P1 12.00 usec  
PL1 -3.55 dB  
PL1W 213.31983948 W  
SFO1 150.9194083 MHz

===== CHANNEL f2 =====  
CPDPRG2 waltz16  
NUC2 1H  
PCPD2 90.00 usec  
PL2 -1.80 dB  
PL12 18.50 dB  
PL13 21.50 dB  
PL2W 30.41515160 W  
PL12W 0.28385070 W  
PL13W 0.14226235 W  
SFO2 600.1339008 MHz  
SI 32768  
SF 150.9028107 MHz  
WDW EM  
SSB 0  
LB 3.00 Hz  
GB 0  
PC 1.00

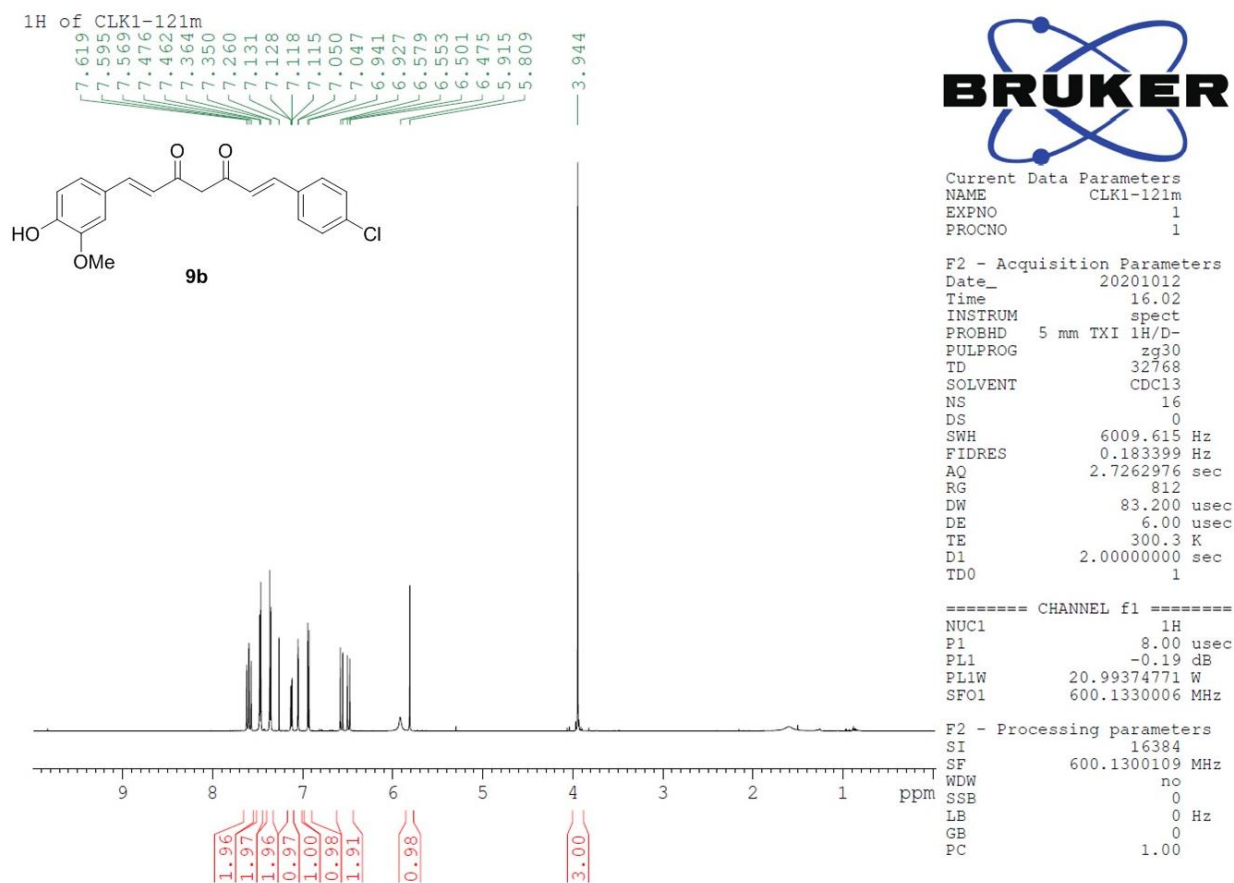

Figure S5. <sup>1</sup>H NMR (600 MHz, CDCl<sub>3</sub>) for compound **9b**.

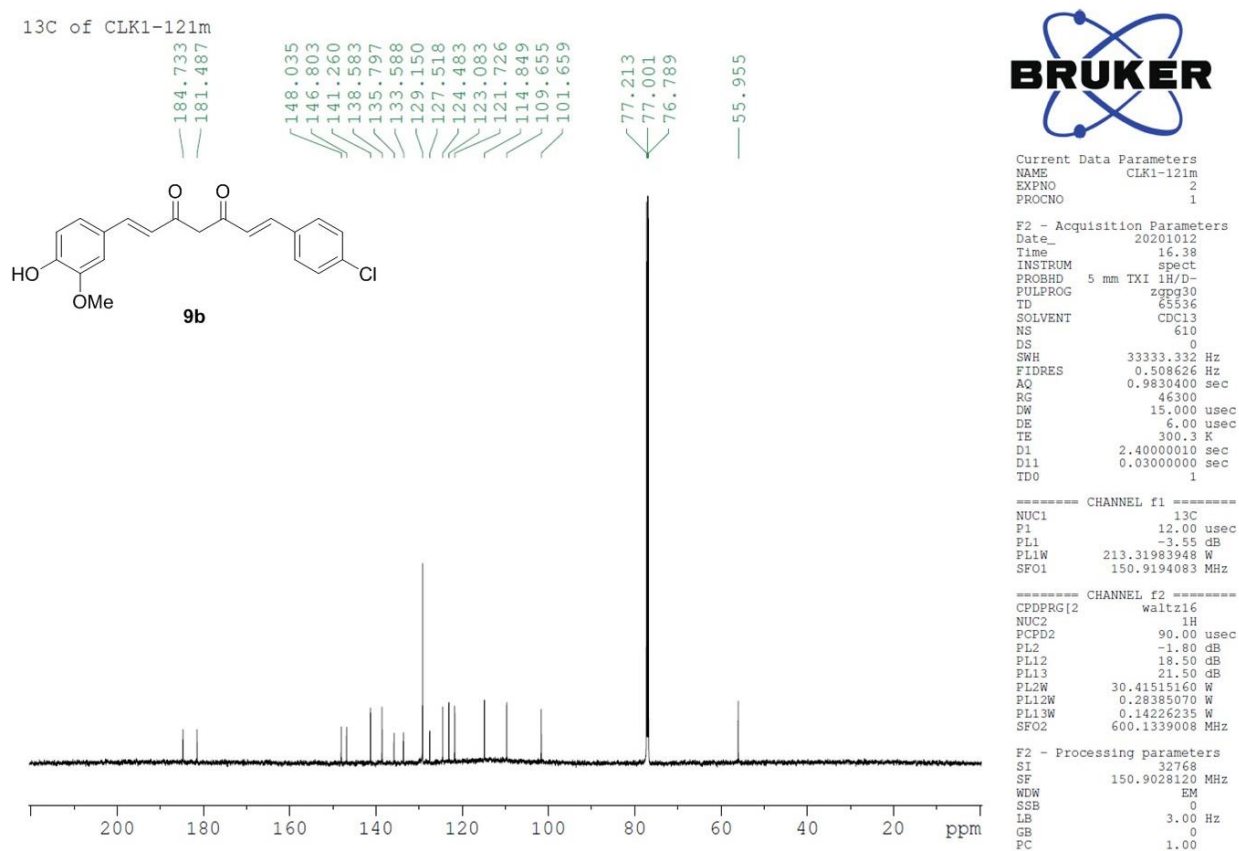

Figure S6. <sup>13</sup>C NMR (150 MHz, CDCl<sub>3</sub>) for compound **9b**.

<sup>1</sup>H of CLK1-72

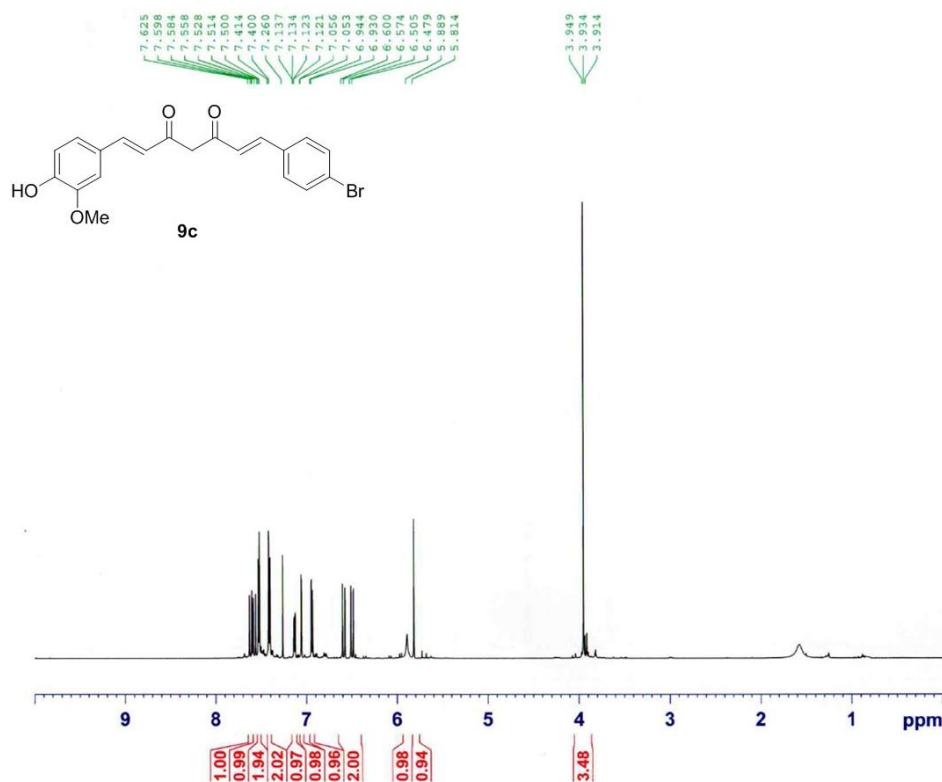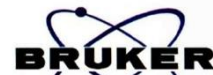

```

NAME      CLK1-72
EXPNO     1
PROCNO    1
Date_     20200911
Time      16.16
INSTRUM   spect
PROBHD    5 mm TXI 1H/D-
PULPROG   zg30
TD         32768
SOLVENT   CDCl3
NS         16
DS         0
SWH        6613.757 Hz
FIDRES     0.201836 Hz
AQ         2.4773865 sec
RG         812
DW         75.600 usec
DE         6.00 usec
TE         300.4 K
D1         2.00000000 sec
TD0        1
  
```

```

===== CHANNEL f1 =====
NUC1      1H
P1         15.00 usec
PL1        -1.00 dB
PL1W       25.29822159 W
SFO1       600.1330006 MHz
SI         32768
SF         600.1300111 MHz
WDW        no
SSB        0
LB         0.00 Hz
GB         0
PC         1.00
  
```

Figure S7. <sup>1</sup>H NMR (600 MHz, CDCl<sub>3</sub>) for compound 9c.

<sup>13</sup>C of CLK1-72

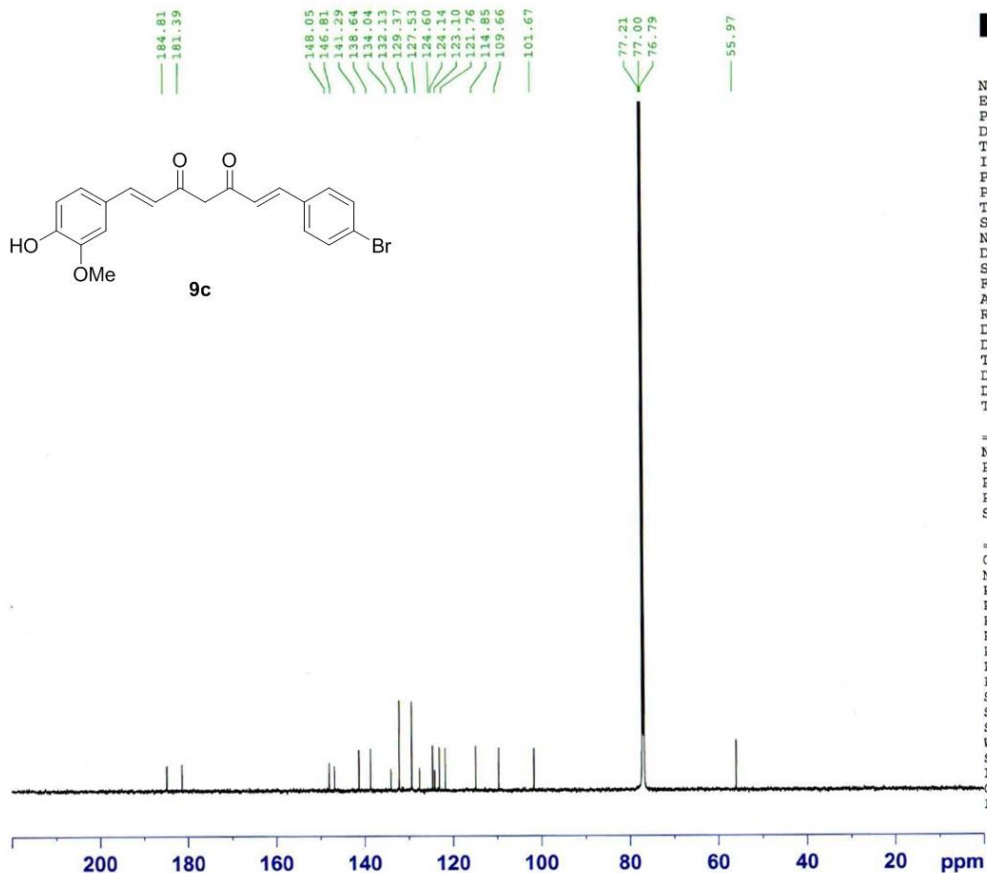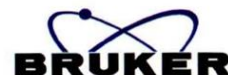

```

NAME      CLK1-72
EXPNO     2
PROCNO    1
Date_     20200910
Time      11.44
INSTRUM   spect
PROBHD    5 mm PABBO BB-
PULPROG   zgpg30
TD         65536
SOLVENT   CDCl3
NS         2096
DS         0
SWH        33333.332 Hz
FIDRES     0.508626 Hz
AQ         0.9831050 sec
RG         46300
DW         15.000 usec
DE         6.00 usec
TE         298.7 K
D1         2.40000010 sec
D11        0.03000000 sec
TD0        1
  
```

```

===== CHANNEL f1 =====
NUC1      13C
P1         10.00 usec
PL1        2.80 dB
PL1W       49.43462753 W
SFO1       150.9194083 MHz
  
```

```

===== CHANNEL f2 =====
CPDPRG2   waltz16
NUC2       1H
PCPD2      90.00 usec
PL2        -1.60 dB
PL12       13.20 dB
PL13       16.20 dB
PL2W       29.04624367 W
PL12W      0.96181160 W
PL13W      0.48204759 W
SFO2       600.1339008 MHz
SI         32768
SF         150.9028100 MHz
WDW        EM
SSB        0
LB         3.00 Hz
GB         0
PC         1.00
  
```

Figure S8. <sup>13</sup>C NMR (150 MHz, CDCl<sub>3</sub>) for compound 9c.



<sup>1</sup>H of CLK1-107up

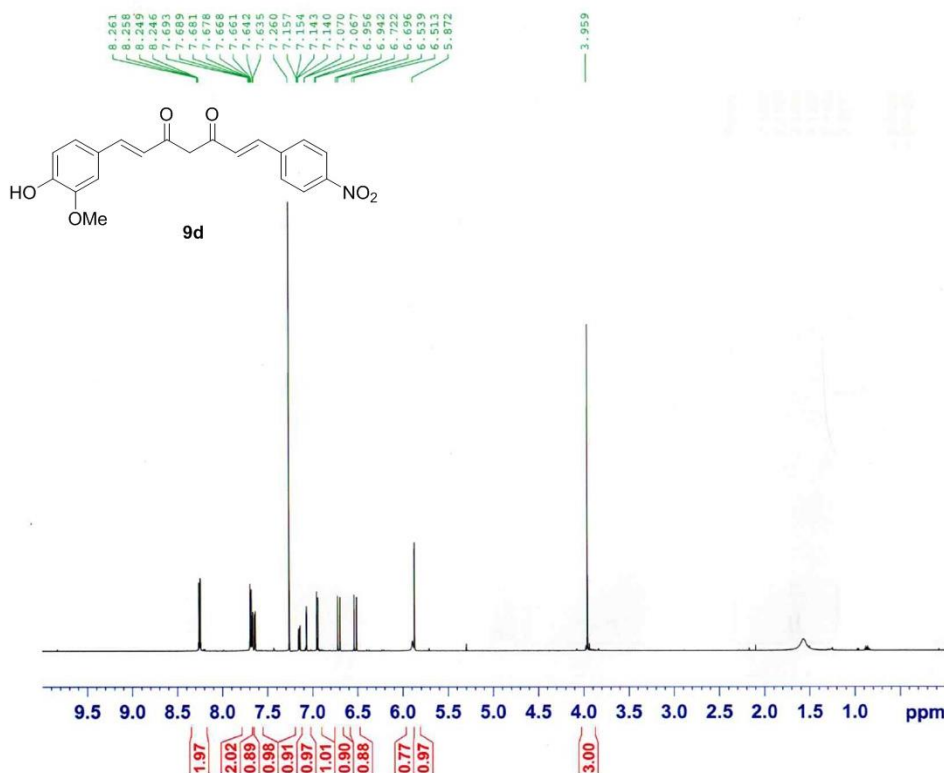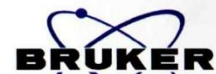

```

NAME      CLK1-107up
EXPNO     1
PROCNO    1
Date_     20210226
Time      8.51
INSTRUM   spect
PROBHD    5 mm TXI 1H/D-
PULPROG   zg30
TD         32768
SOLVENT   CDCl3
NS         16
DS         0
SWH        6613.757 Hz
FIDRES     0.201836 Hz
AQ         2.4773865 sec
RG         5160
DW         75.600 usec
DE         6.00 usec
TE         300.1 K
D1         2.00000000 sec
TD0        1

===== CHANNEL f1 =====
NUC1       1H
P1         8.00 usec
PL1        -0.40 dB
PL1W       22.03382874 W
SFO1       600.1330006 MHz
SI         32768
SF         600.1300104 MHz
WDW        no
SSB        0
LB         0.00 Hz
GB         0
PC         1.00
  
```

Figure S9. <sup>1</sup>H NMR (600 MHz, CDCl<sub>3</sub>) for compound 9d.

<sup>13</sup>C of CLK1-107up

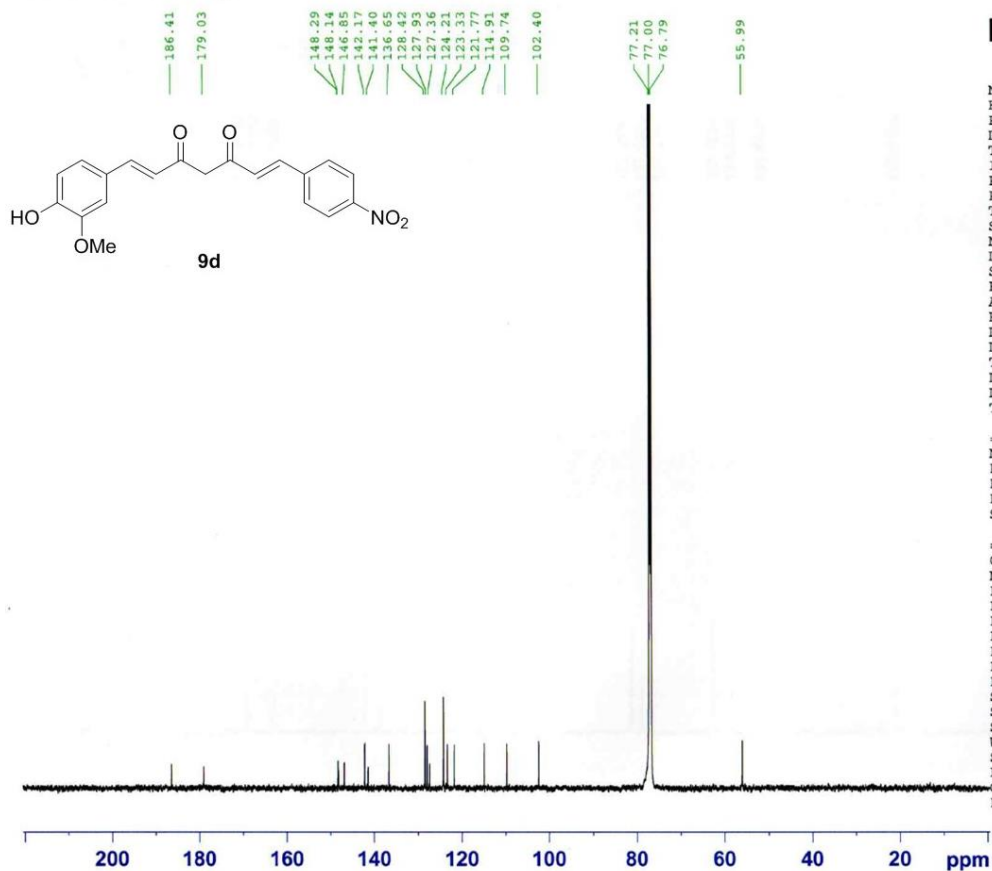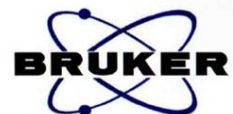

```

NAME      CLK1-107up
EXPNO     2
PROCNO    1
Date_     20210226
Time      6.01
INSTRUM   spect
PROBHD    5 mm PABBO BB-
PULPROG   zgpg30
TD         65536
SOLVENT   CDCl3
NS         16000
DS         0
SWH        33333.332 Hz
FIDRES     0.508626 Hz
AQ         0.9831050 sec
RG         46300
DW         15.000 usec
DE         6.00 usec
TE         298.4 K
D1         2.40000010 sec
D11        0.03000000 sec
TD0        1

===== CHANNEL f1 =====
NUC1       13C
P1         10.00 usec
PL1        2.80 dB
PL1W       49.43462753 W
SFO1       150.9194083 MHz

===== CHANNEL f2 =====
CPDPRG2    waltz16
NUC2        1H
PCPD2      90.00 usec
PL2        -1.60 dB
PL12       13.20 dB
PL13       16.20 dB
PL2W       29.04624367 W
PL12W      0.96181160 W
PL13W      0.48204759 W
SFO2       600.1339008 MHz
SI         32768
SF         150.9028080 MHz
WDW        EM
SSB        0
LB         3.00 Hz
GB         0
PC         1.00
  
```

Figure S10. <sup>13</sup>C NMR (150 MHz, CDCl<sub>3</sub>) for compound 9d.



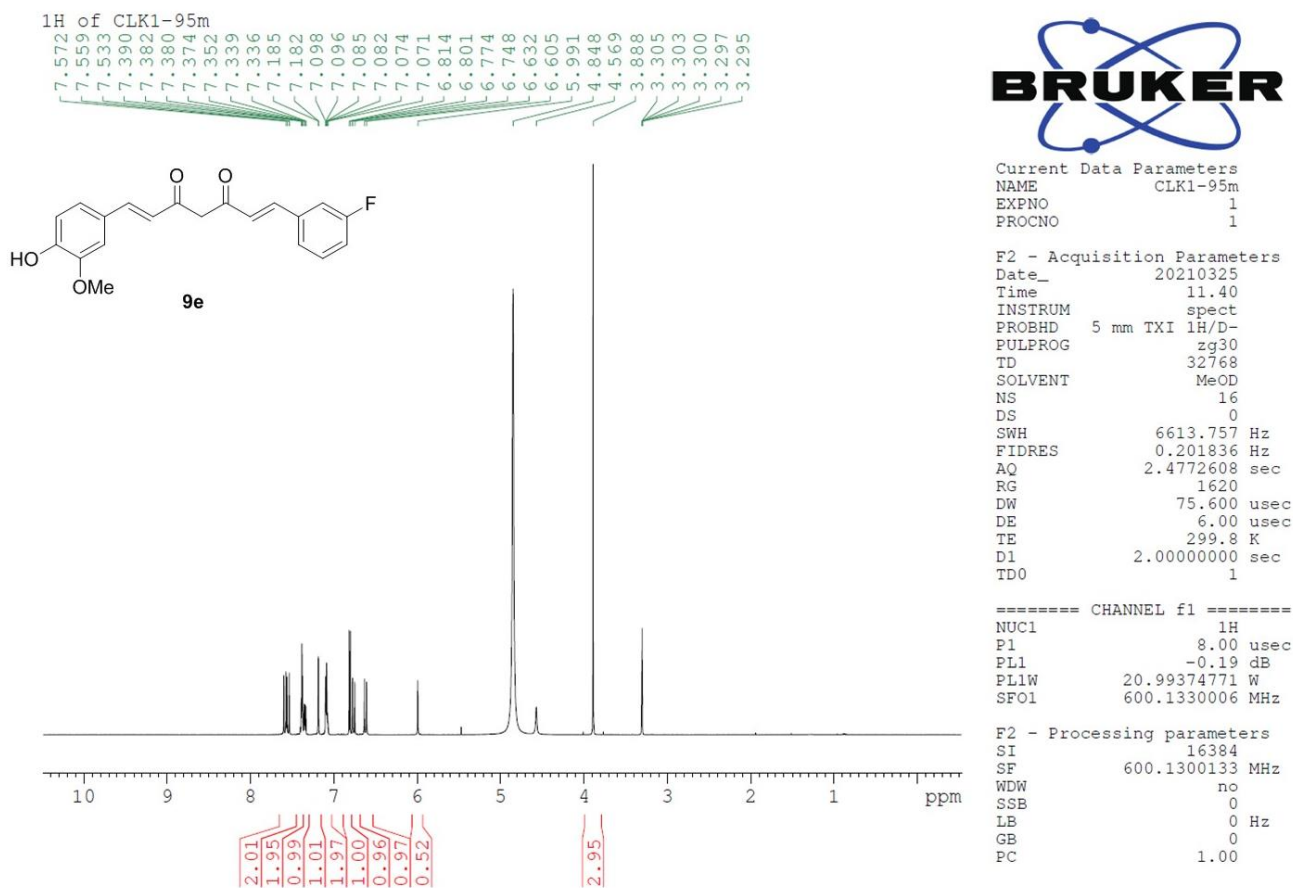

Figure S11. <sup>1</sup>H NMR (600 MHz, CD<sub>3</sub>OD) for compound **9e**.

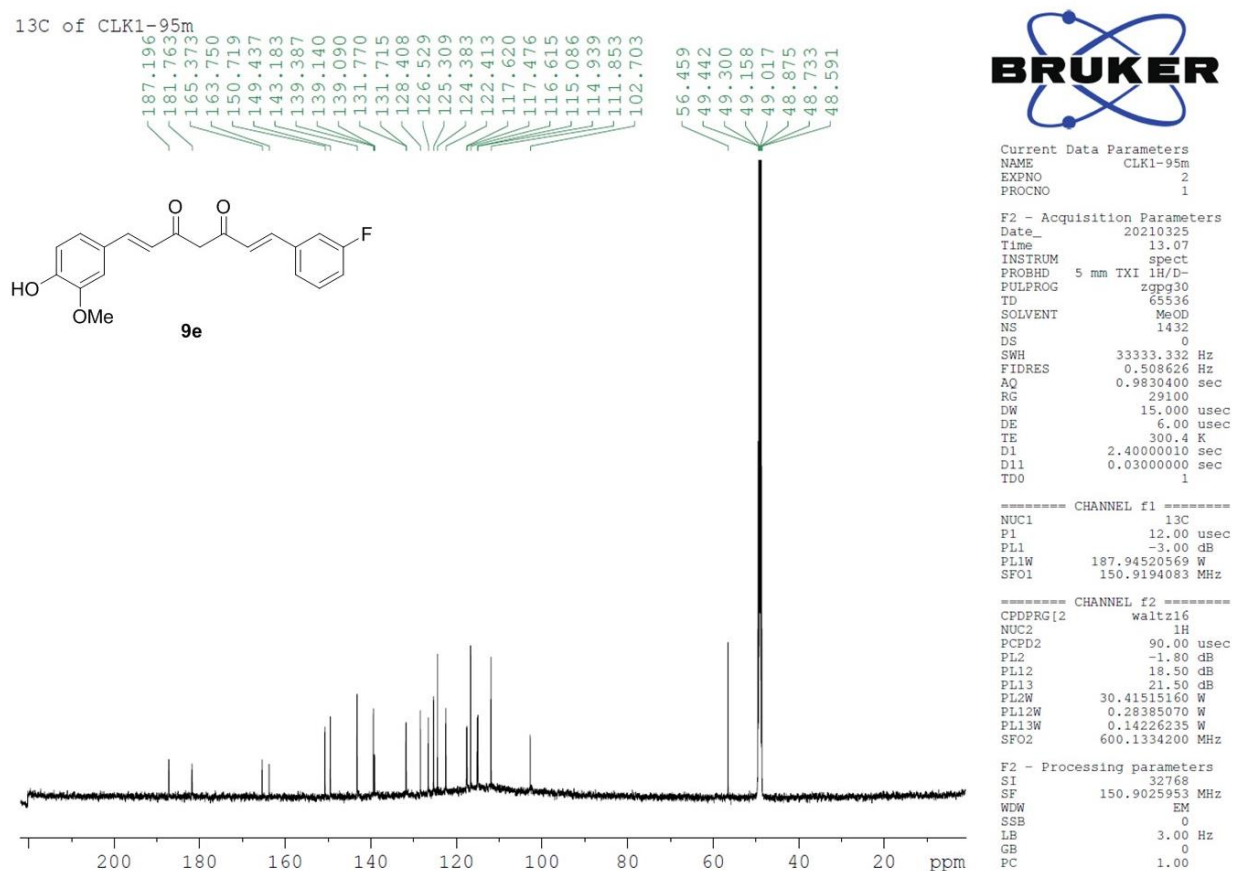

Figure S12. <sup>13</sup>C NMR (150 MHz, CD<sub>3</sub>OD) for compound **9e**.

<sup>1</sup>H of CLK1-97m

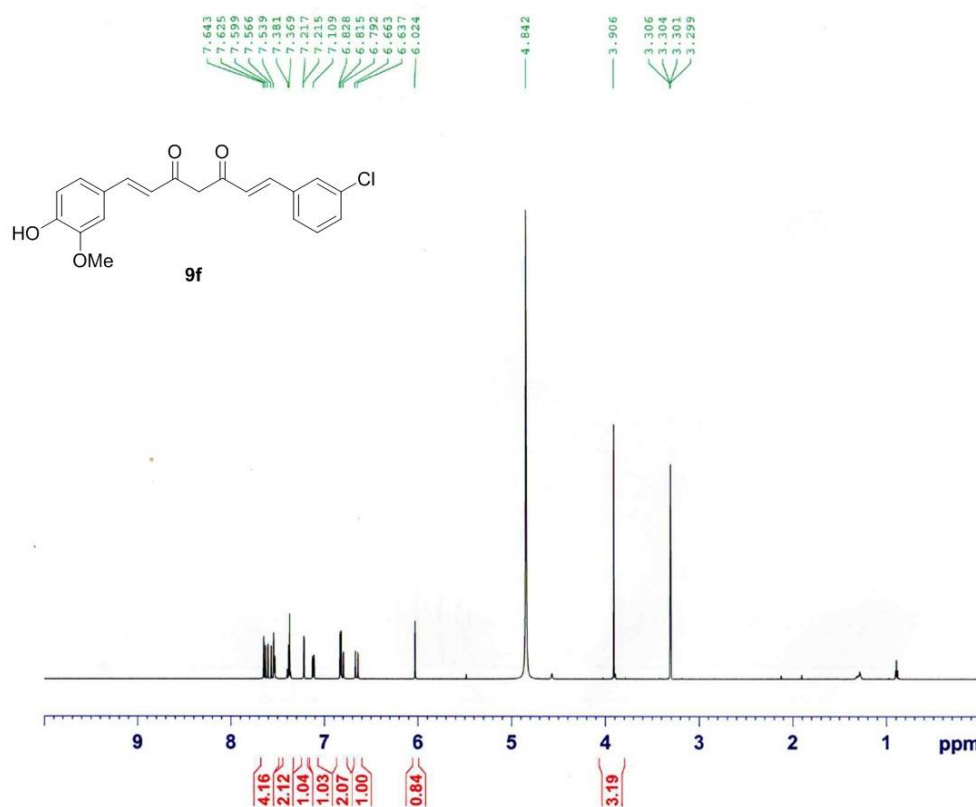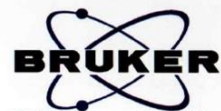

NAME CLK1-97m  
EXPNO 11  
PROCNO 1  
Date\_ 20210315  
Time 9.51  
INSTRUM spect  
PROBHD 5 mm TXI 1H/D-  
PULPROG zg30  
TD 32768  
SOLVENT MeOD  
NS 16  
DS 0  
SWH 6613.757 Hz  
FIDRES 0.201836 Hz  
AQ 2.4773865 sec  
RG 6500  
DW 75.600 usec  
DE 6.00 usec  
TE 300.4 K  
D1 2.00000000 sec  
TD0 1

===== CHANNEL f1 =====  
NUC1 1H  
P1 8.00 usec  
PL1 -0.19 dB  
PL1W 20.9937471 W  
SFO1 600.1330006 MHz  
SI 16384  
SF 600.1300111 MHz  
WDW no  
SSB 0  
LB 0.00 Hz  
GB 0  
PC 1.00

Figure S13. <sup>1</sup>H NMR (600 MHz, CD<sub>3</sub>OD) for compound 9f.

<sup>13</sup>C of CLK1-97m

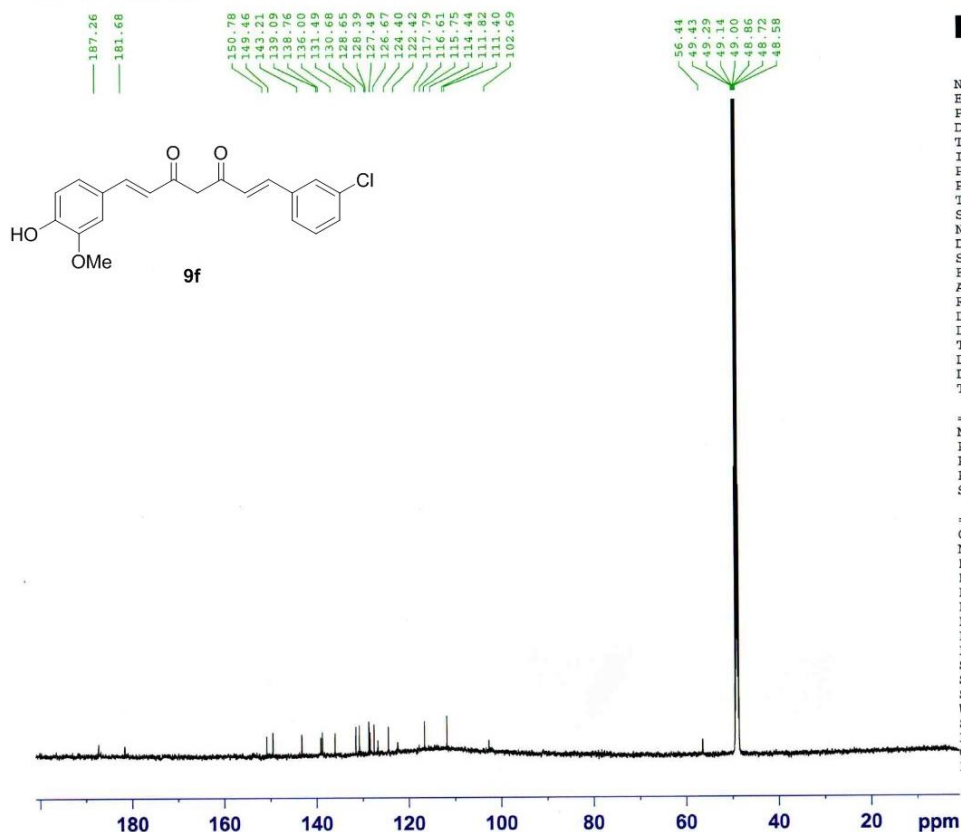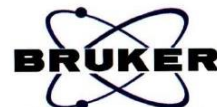

NAME CLK1-97m  
EXPNO 12  
PROCNO 1  
Date\_ 20210315  
Time 11.42  
INSTRUM spect  
PROBHD 5 mm TXI 1H/D-  
PULPROG zgpg30  
TD 65536  
SOLVENT MeOD  
NS 1822  
DS 0  
SWH 33333.332 Hz  
FIDRES 0.508626 Hz  
AQ 0.9831050 sec  
RG 29100  
DW 15.000 usec  
DE 6.00 usec  
TE 300.4 K  
D1 2.40000010 sec  
D11 0.03000000 sec  
TD0 1

===== CHANNEL f1 =====  
NUC1 13C  
P1 10.95 usec  
PL1 -4.00 dB  
PL1W 236.60900879 W  
SFO1 150.9194083 MHz

===== CHANNEL f2 =====  
CPDPRG2 waltz16  
NUC2 1H  
PCPD2 90.00 usec  
PL2 2.00 dB  
PL12 19.00 dB  
PL13 21.00 dB  
PL2W 12.67914581 W  
PL12W 0.25298220 W  
PL13W 0.15962099 W  
SFO2 600.1339008 MHz  
SI 32768  
SF 150.9025953 MHz  
WDW EM  
SSB 0  
LB 3.00 Hz  
GB 0  
PC 1.00

Figure S14. <sup>13</sup>C NMR (150 MHz, CD<sub>3</sub>OD) for compound 9f.

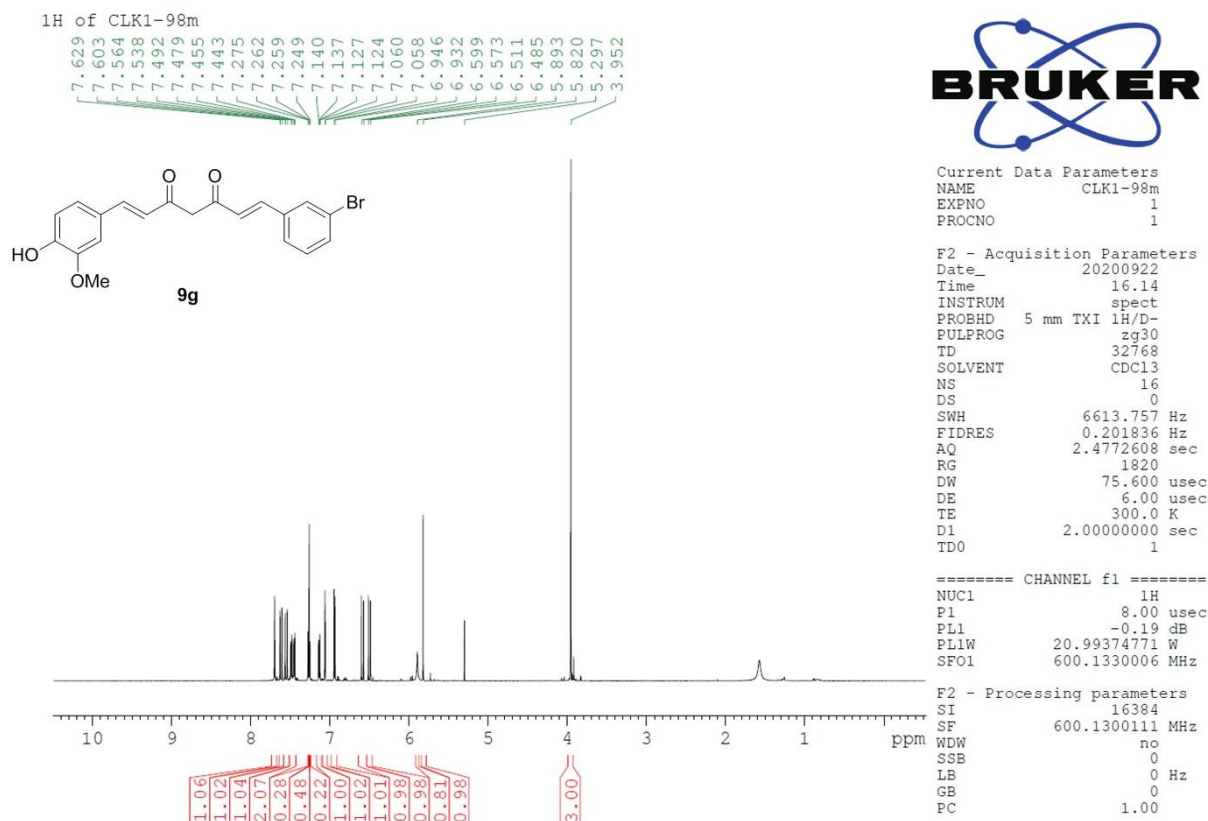

Figure S15. <sup>1</sup>H NMR (600 MHz, CDCl<sub>3</sub>) for compound 9g.

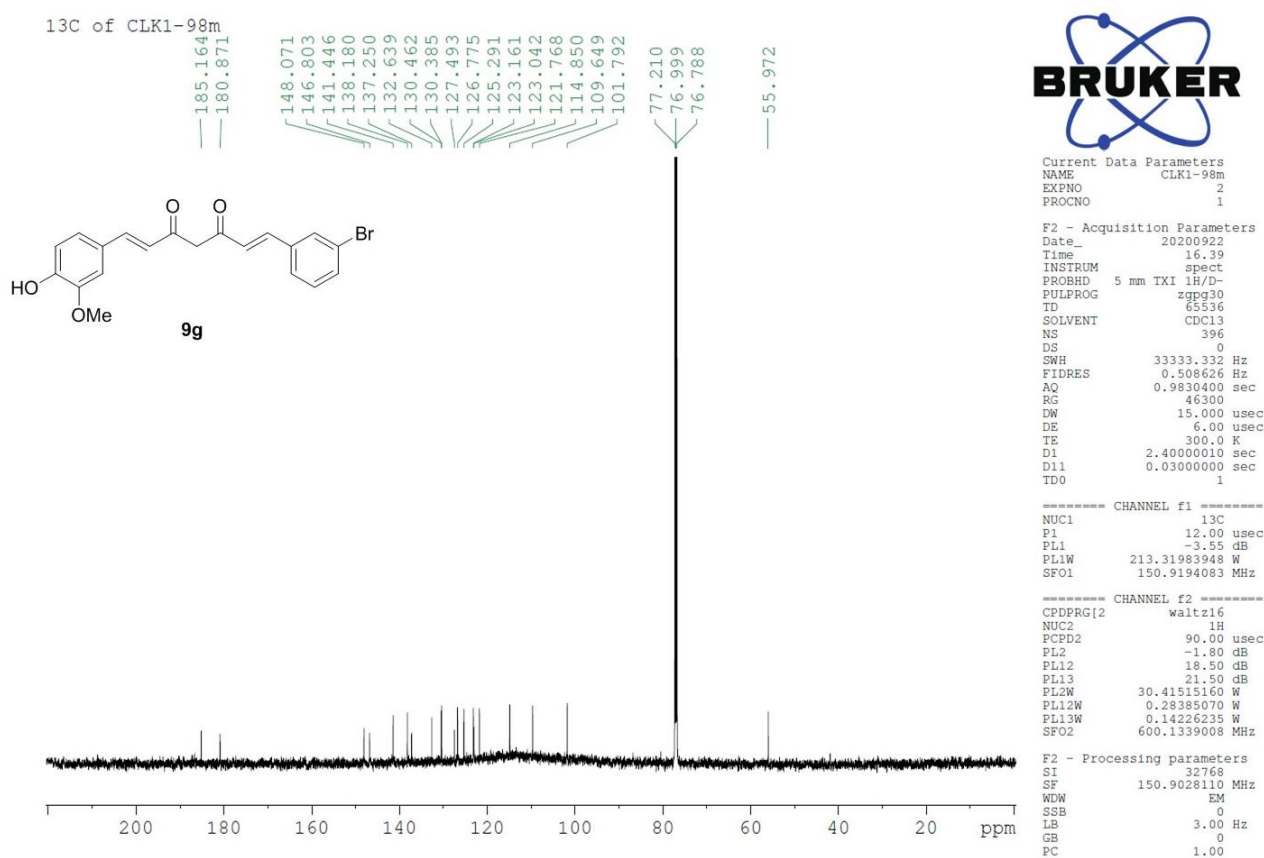

Figure S16. <sup>13</sup>C NMR (150 MHz, CDCl<sub>3</sub>) for compound 9g.

<sup>1</sup>H of CLK1-99m

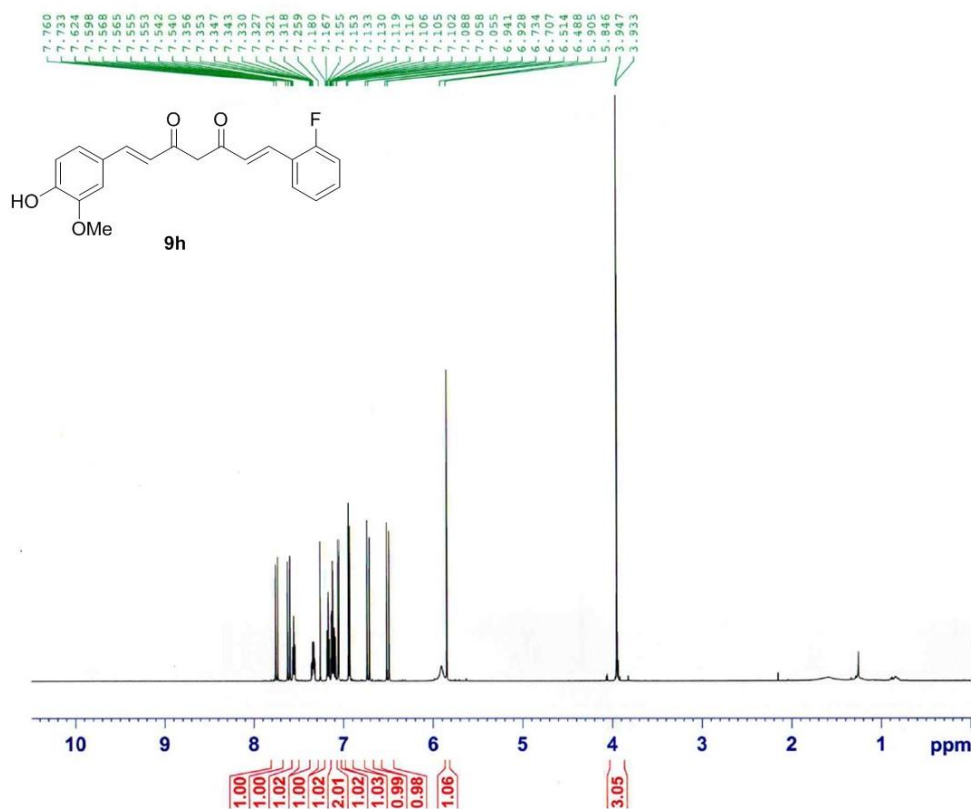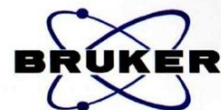

NAME CLK1-99m  
EXPNO 1  
PROCNO 1  
Date\_ 20200921  
Time 16.06  
INSTRUM spect  
PROBHD 5 mm TXI 1H/D-  
PULPROG zg30  
TD 32768  
SOLVENT CDCl3  
NS 16  
DS 0  
SWH 6613.757 Hz  
FIDRES 0.201836 Hz  
AQ 2.4773865 sec  
RG 1820  
DW 75.600 usec  
DE 6.00 usec  
TE 300.0 K  
D1 2.00000000 sec  
TD0 1

===== CHANNEL f1 =====  
NUC1 1H  
P1 8.00 usec  
PL1 -0.19 dB  
PL1W 20.99374771 W  
SFO1 600.1330006 MHz  
SI 16384  
SF 600.1330111 MHz  
WDW no  
SSB 0  
LB 0.00 Hz  
GB 0  
PC 1.00

Figure S17. <sup>1</sup>H NMR (600 MHz, CDCl<sub>3</sub>) for compound 9h.

<sup>13</sup>C of CLK1-99m

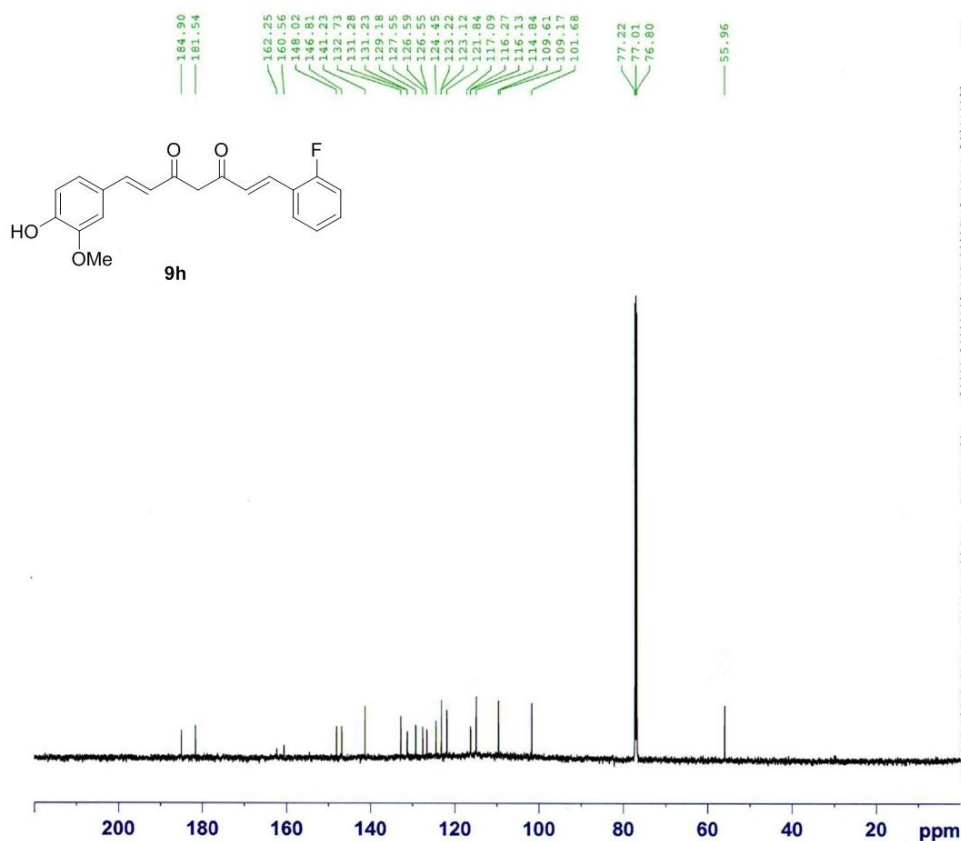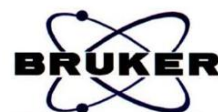

NAME CLK1-99m  
EXPNO 2  
PROCNO 1  
Date\_ 20200921  
Time 16.24  
INSTRUM spect  
PROBHD 5 mm TXI 1H/D-  
PULPROG zgpg30  
TD 65536  
SOLVENT CDCl3  
NS 266  
DS 0  
SWH 33333.332 Hz  
FIDRES 0.508626 Hz  
AQ 0.9831050 sec  
RG 46300  
DW 15.000 usec  
DE 6.00 usec  
TE 300.0 K  
D1 2.40000010 sec  
D11 0.03000000 sec  
TD0 1

===== CHANNEL f1 =====  
NUC1 13C  
P1 12.00 usec  
PL1 -3.55 dB  
PL1W 213.31983948 W  
SFO1 150.9194083 MHz

===== CHANNEL f2 =====  
CPDPRG2 waltz16  
NUC2 1H  
PCPD2 90.00 usec  
PL2 -1.80 dB  
PL12 18.50 dB  
PL13 21.50 dB  
PL2W 30.41515160 W  
PL12W 0.28385070 W  
PL13W 0.14226235 W  
SFO2 600.1339008 MHz  
SI 32768  
SF 150.9028108 MHz  
WDW EM  
SSB 0  
LB 3.00 Hz  
GB 0  
PC 1.00

Figure S18. <sup>13</sup>C NMR (150 MHz, CDCl<sub>3</sub>) for compound 9h.



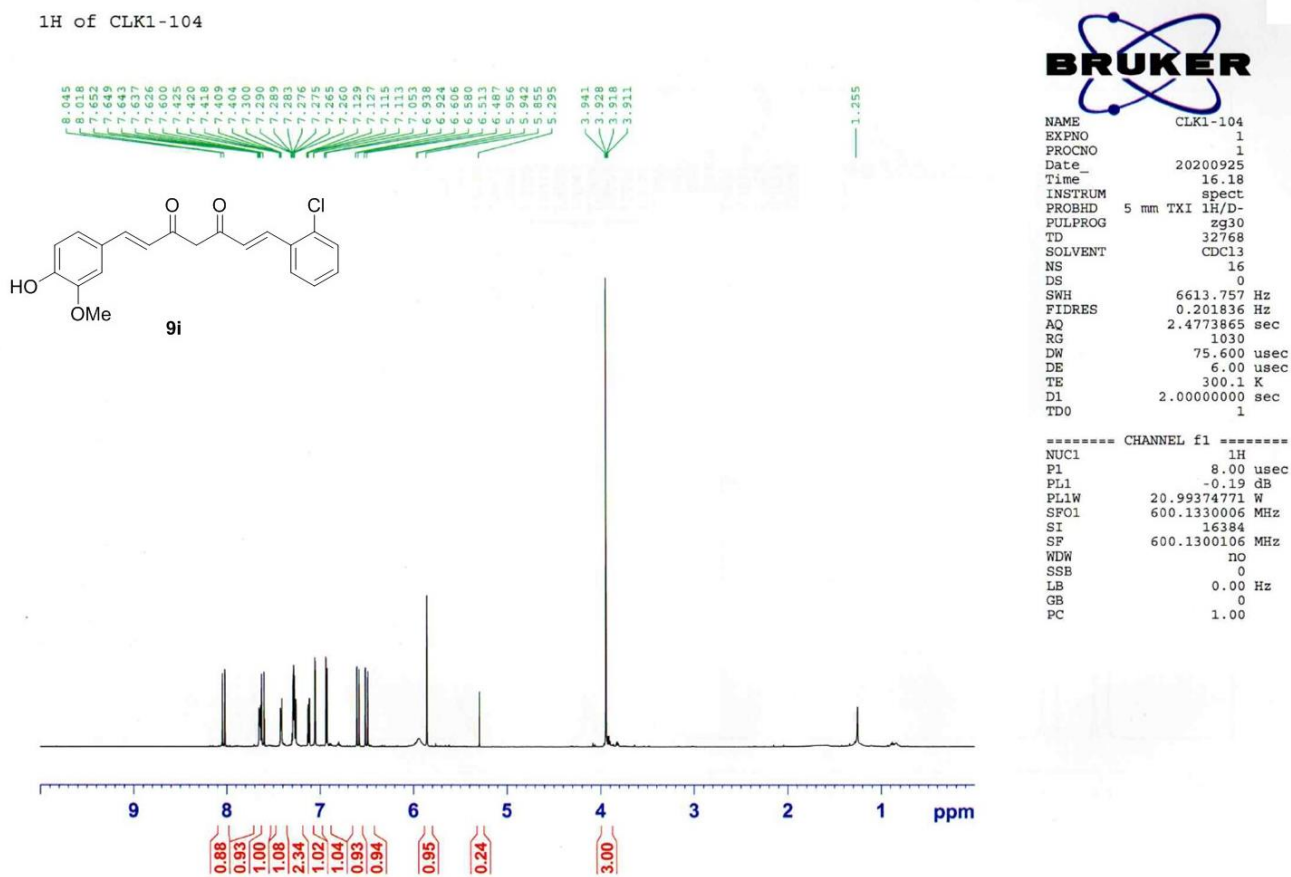

Figure S19. <sup>1</sup>H NMR (600 MHz, CDCl<sub>3</sub>) for compound 9i.

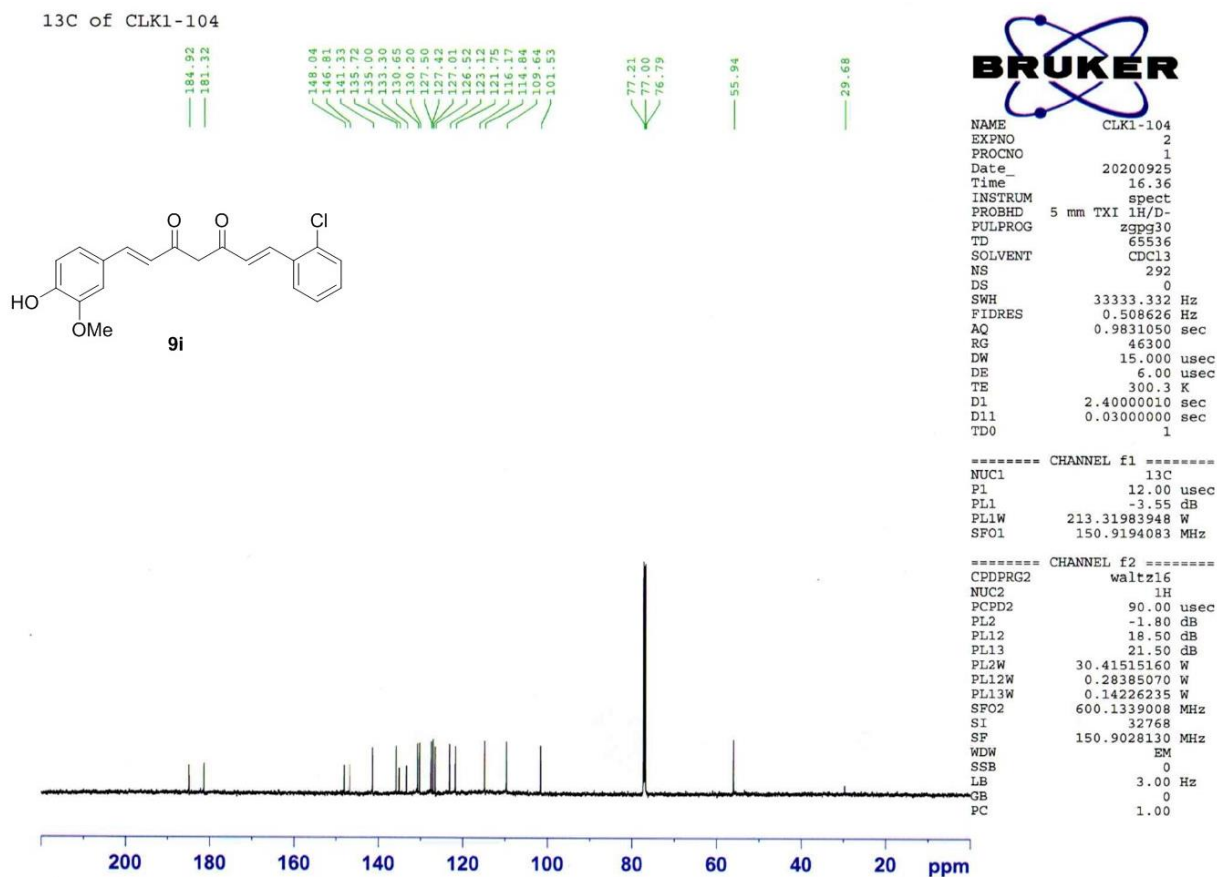

Figure S20. <sup>13</sup>C NMR (150 MHz, CDCl<sub>3</sub>) for compound 9i.

<sup>1</sup>H of CLK1-105m

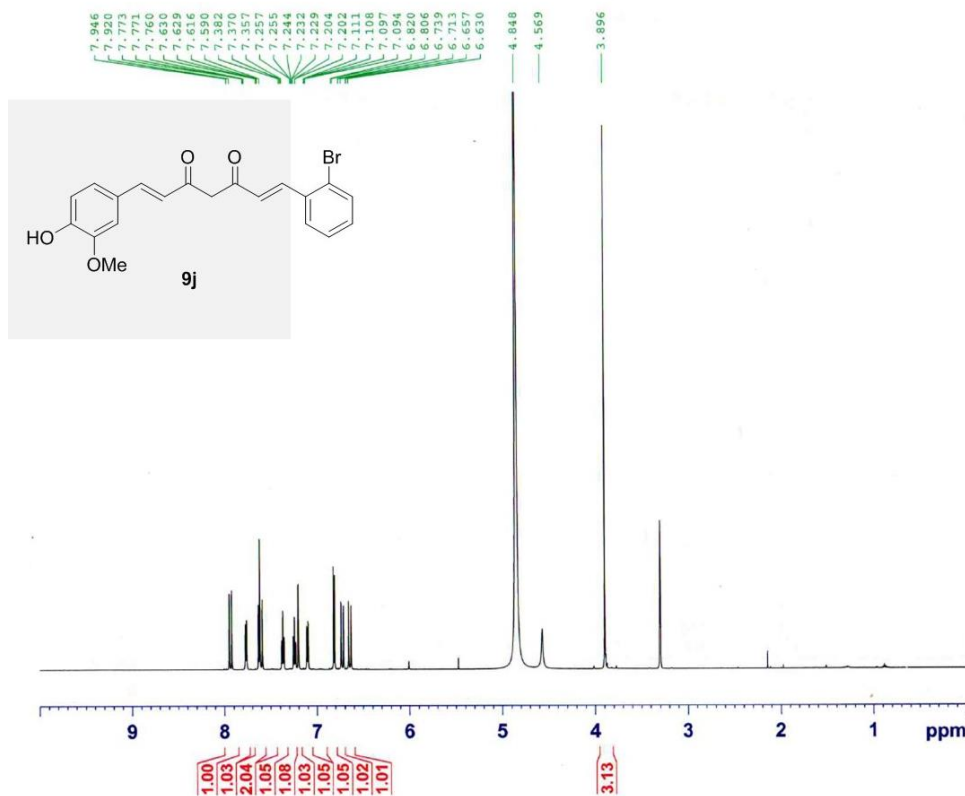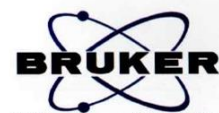

NAME CLK1-105m  
EXPNO 201  
PROCNO 1  
Date\_ 20210414  
Time\_ 15.42  
INSTRUM spect  
PROBHD 5 mm TXI 1H/D-  
PULPROG zg30  
TD 32768  
SOLVENT MeOD  
NS 16  
DS 0  
SWH 6613.757 Hz  
FIDRES 0.201836 Hz  
AQ 2.4773865 sec  
RG 1150  
DW 75.600 usec  
DE 6.00 usec  
TE 299.9 K  
D1 2.00000000 sec  
TD0 1

===== CHANNEL f1 =====  
NUC1 1H  
P1 8.00 usec  
PL1 -0.19 dB  
PL1W 20.99374771 W  
SFO1 600.1330006 MHz  
SI 16384  
SF 600.1300131 MHz  
WDW no  
SSB 0  
LB 0.00 Hz  
GB 0  
PC 1.00

Figure S21. <sup>1</sup>H NMR (600 MHz, CD<sub>3</sub>OD) for compound 9j.

<sup>13</sup>C of CLK1-105m

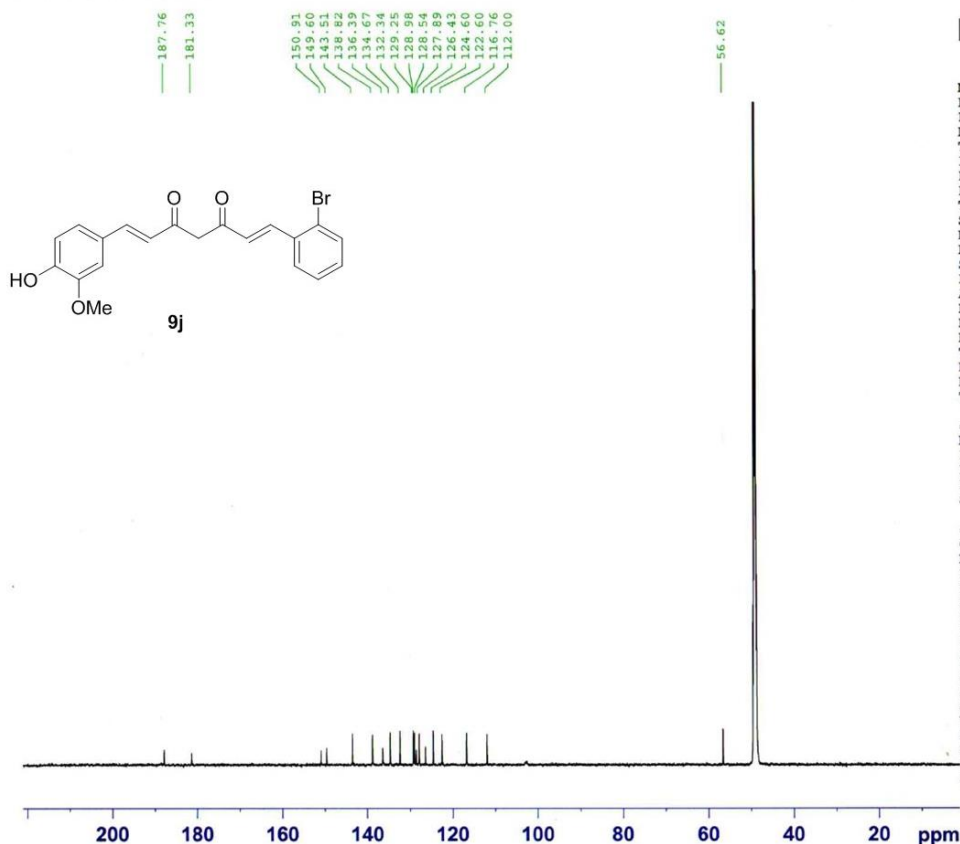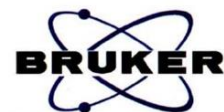

NAME CLK1-105m  
EXPNO 202  
PROCNO 1  
Date\_ 20210414  
Time\_ 13.52  
INSTRUM spect  
PROBHD 5 mm PABBO BB-  
PULPROG zgpg30  
TD 65536  
SOLVENT MeOD  
NS 3123  
DS 0  
SWH 33333.332 Hz  
FIDRES 0.508626 Hz  
AQ 0.9831050 sec  
RG 46300  
DW 15.000 usec  
DE 6.00 usec  
TE 298.4 K  
D1 2.40000010 sec  
D11 0.03000000 sec  
TD0 1

===== CHANNEL f1 =====  
NUC1 13C  
P1 10.00 usec  
PL1 2.80 dB  
PL1W 49.43462753 W  
SFO1 150.9194083 MHz

===== CHANNEL f2 =====  
CPDPRG2 waltz16  
NUC2 1H  
PCPD2 90.00 usec  
PL2 -1.60 dB  
PL12 13.20 dB  
PL13 16.20 dB  
PL2W 29.04624367 W  
PL12W 0.96181160 W  
PL13W 0.48204759 W  
SFO2 600.1339008 MHz  
SI 32768  
SF 150.9025731 MHz  
WDW EM  
SSB 0  
LB 3.00 Hz  
GB 0  
PC 1.00

Figure S22. <sup>13</sup>C NMR (150 MHz, CD<sub>3</sub>OD) for compound 9j.



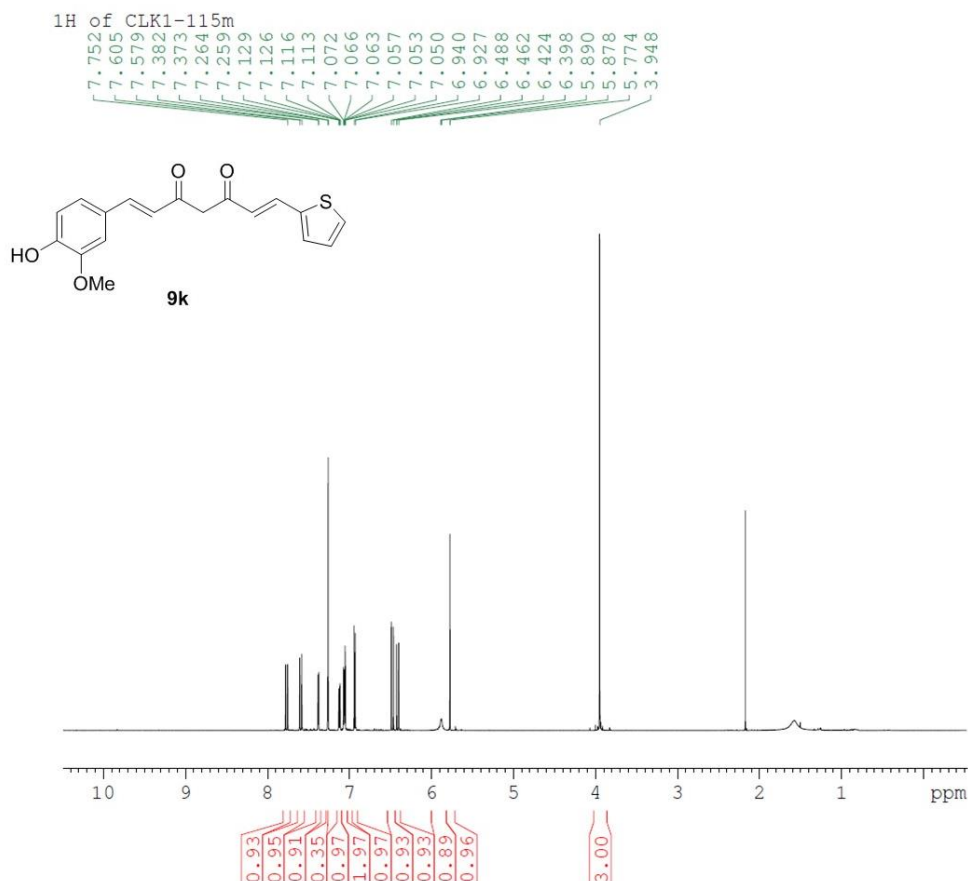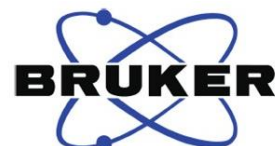

Current Data Parameters  
NAME CLK1-115m  
EXPNO 1  
PROCNO 1

F2 - Acquisition Parameters  
Date\_ 20200918  
Time 8.51  
INSTRUM spect  
PROBHD 5 mm TXI 1H/D-  
PULPROG zg30  
TD 32768  
SOLVENT CDCl3  
NS 16  
DS 0  
SWH 6613.757 Hz  
FIDRES 0.201836 Hz  
AQ 2.4772608 sec  
RG 4100  
DW 75.600 usec  
DE 6.00 usec  
TE 299.8 K  
D1 2.00000000 sec  
TD0 1

===== CHANNEL f1 =====  
NUC1 1H  
P1 8.00 usec  
PL1 -0.19 dB  
PL1W 20.99374771 W  
SFO1 600.1330006 MHz

F2 - Processing parameters  
SI 16384  
SF 600.1300111 MHz  
WDW no  
SSB 0  
LB 0 Hz  
GB 0  
PC 1.00

Figure S23. <sup>1</sup>H NMR (600 MHz, CDCl<sub>3</sub>) for compound 9k.

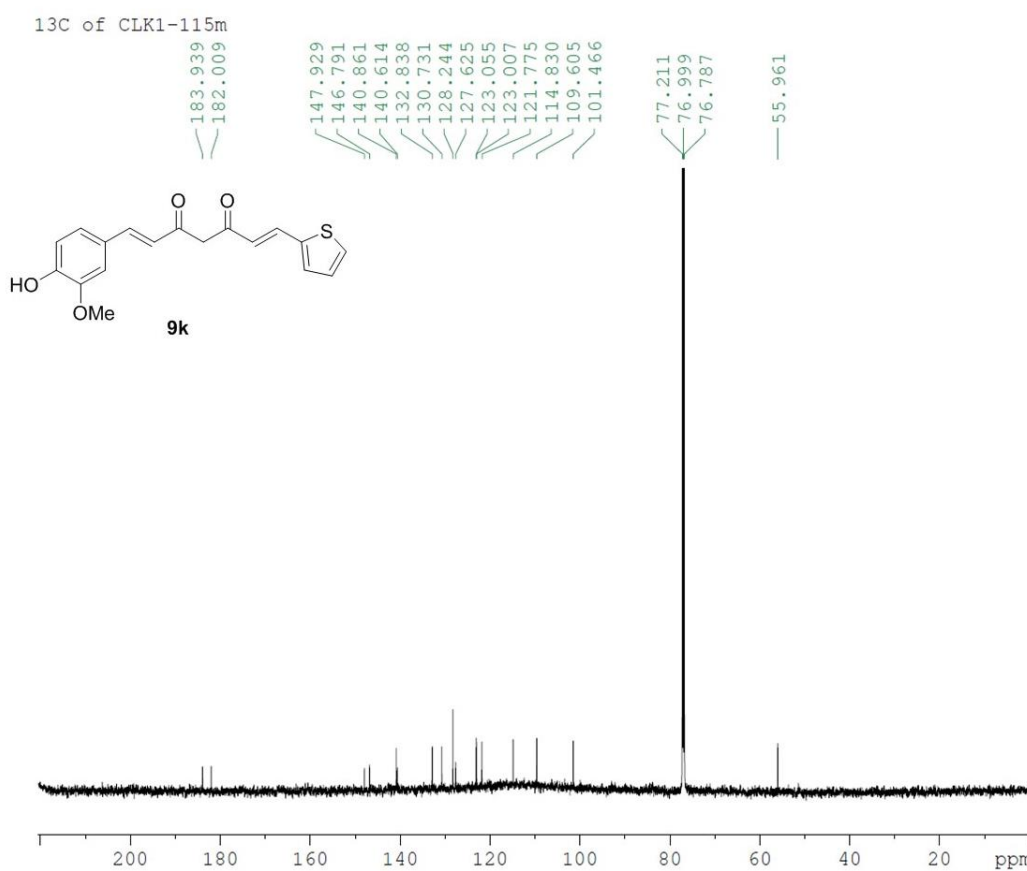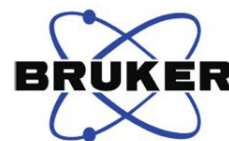

Current Data Parameters  
NAME CLK1-115m  
EXPNO 2  
PROCNO 1

F2 - Acquisition Parameters  
Date\_ 20200918  
Time 9.18  
INSTRUM spect  
PROBHD 5 mm TXI 1H/D-  
PULPROG zgpg30  
TD 65536  
SOLVENT CDCl3  
NS 412  
DS 0  
SWH 33333.332 Hz  
FIDRES 0.508626 Hz  
AQ 0.9830400 sec  
RG 46300  
DW 15.000 usec  
DE 6.00 usec  
TE 300.0 K  
D1 2.40000010 sec  
D11 0.03000000 sec  
TD0 1

===== CHANNEL f1 =====  
NUC1 13C  
P1 12.00 usec  
PL1 -3.55 dB  
PL1W 213.31983948 W  
SFO1 150.9194083 MHz

===== CHANNEL f2 =====  
CPDPRG[2] waltz16  
NUC2 1H  
PCPD2 90.00 usec  
PL2 -1.80 dB  
PL12 18.50 dB  
PL13 21.50 dB  
PL2W 30.41515160 W  
PL12W 0.28385070 W  
PL13W 0.14226235 W  
SFO2 600.1339008 MHz

F2 - Processing parameters  
SI 32768  
SF 150.9028108 MHz  
WDW EM  
SSB 0  
LB 3.00 Hz  
GB 0  
PC 1.00

Figure S24. <sup>13</sup>C NMR (150 MHz, CDCl<sub>3</sub>) for compound 9k.

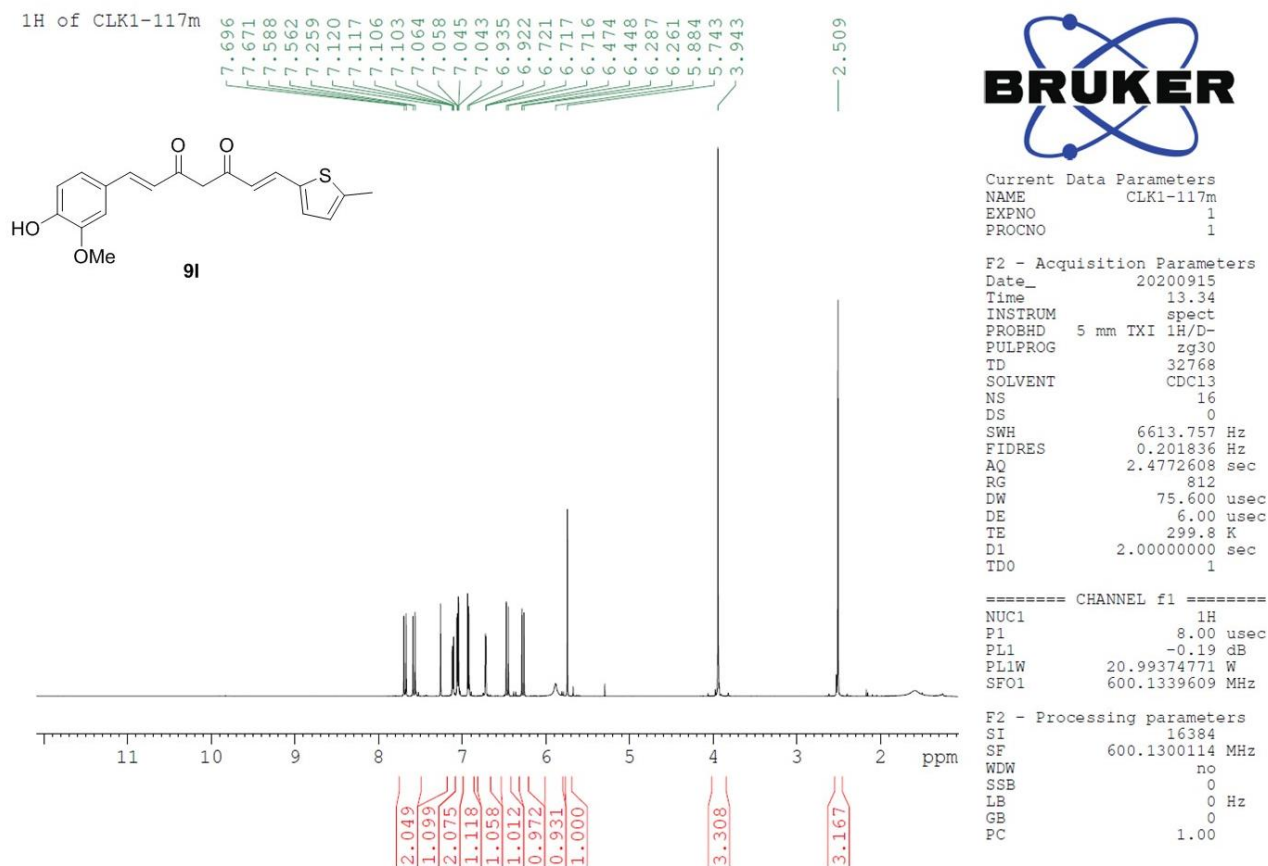

Figure S25. <sup>1</sup>H NMR (600 MHz, CDCl<sub>3</sub>) for compound 9l.

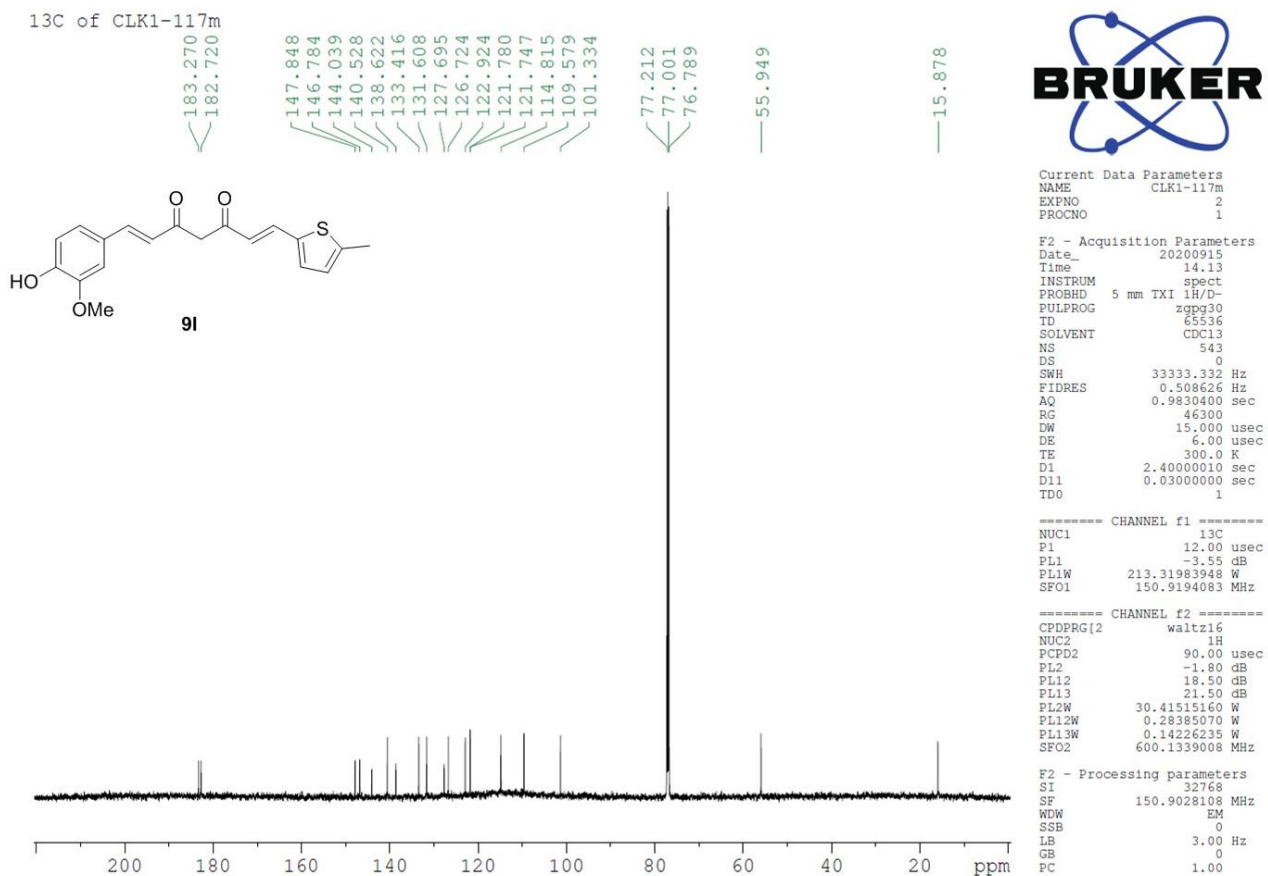

Figure S26. <sup>13</sup>C NMR (150 MHz, CDCl<sub>3</sub>) for compound 9l.

<sup>1</sup>H of KYL-26

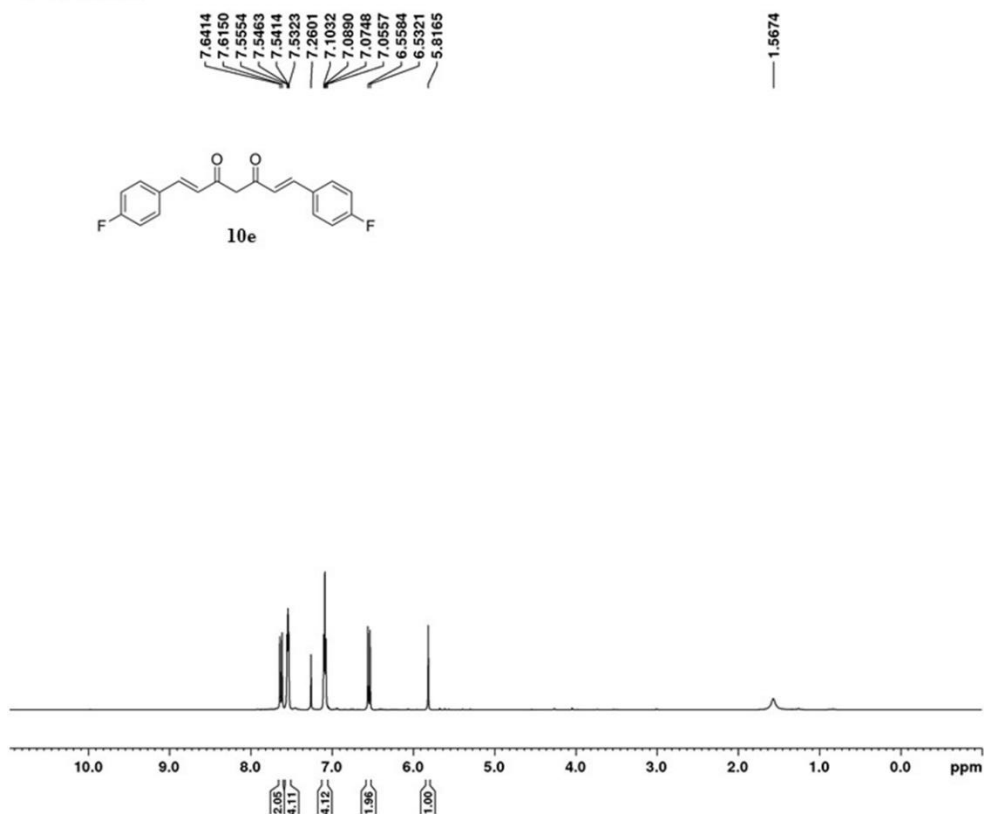

Figure S27. <sup>1</sup>H NMR (600 MHz, CDCl<sub>3</sub>) for compound 10e.

<sup>13</sup>C of KYL-26

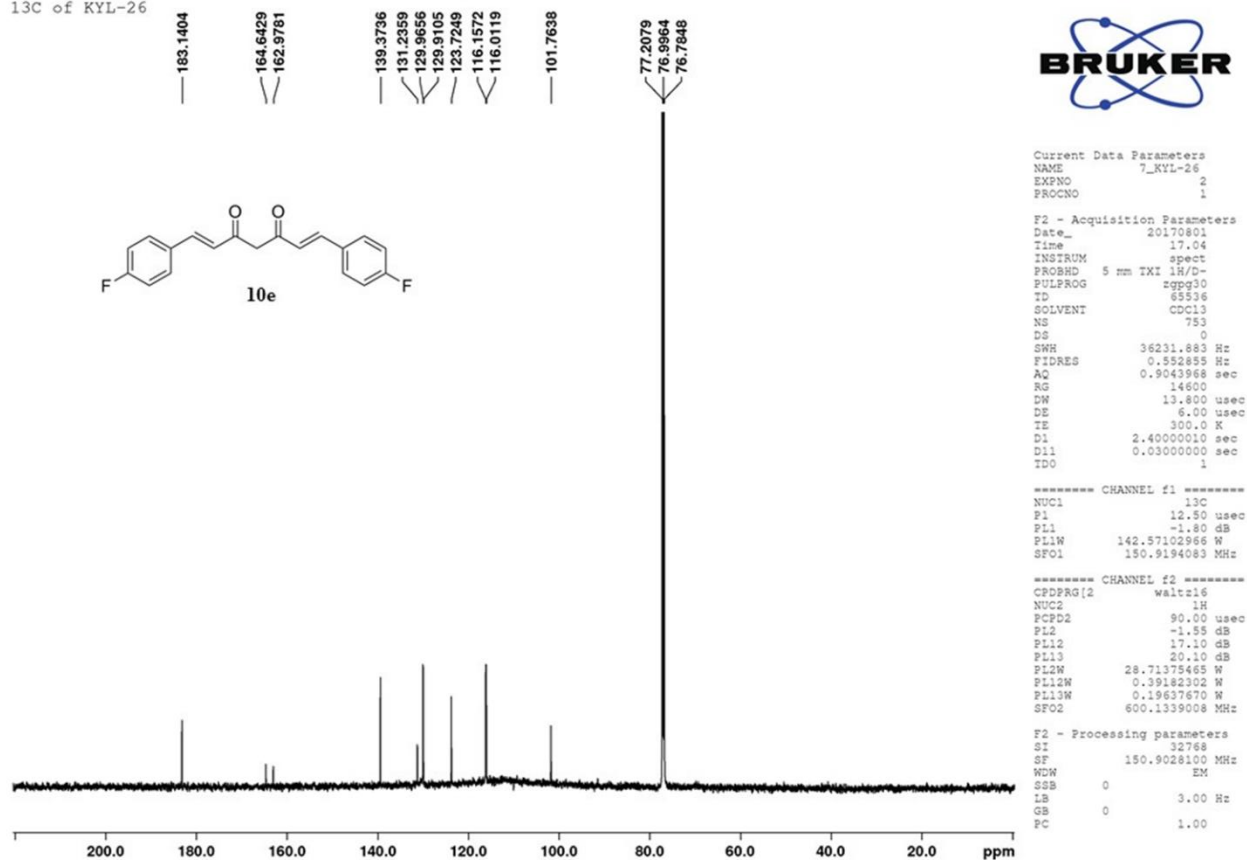

Figure S28. <sup>13</sup>C NMR (150 MHz, CDCl<sub>3</sub>) for compound 10e.

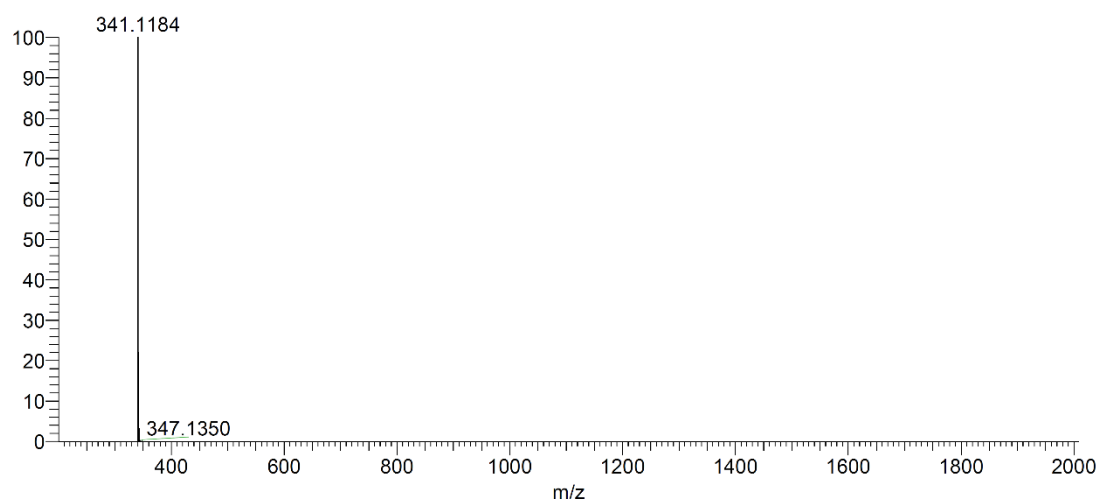

NL:  
7.97E5  
C<sub>20</sub> H<sub>17</sub> FO<sub>4</sub> +H:  
C<sub>20</sub> H<sub>18</sub> F<sub>1</sub> O<sub>4</sub>  
c (gss, s /p:40)(Val) Chrg 1  
R: 20000 Res .Pwr . @FWHM

Figure S29. HR-ESI-MS for compound **9a**
